# Supplementary material
Source: PubMed Central journal article supplement (PMC7049804)
Supplement: EMBJ-39-e102541-s001.pdf [file EMBJ-39-e102541-s001.pdf]

# **UHMK1 promotes gastric cancer progression through reprogramming nucleotide metabolism**

Xing Feng\*<sup>1</sup>, Jiabao Zhao\*<sup>2</sup>, Dong Ma\*<sup>3</sup>, Yongxi Song<sup>4</sup>, Yuekun Zhu<sup>5,6</sup>, Qingxin Zhou<sup>7</sup>, Fei Ma<sup>8</sup>, Xing Liu<sup>9</sup>, Mengya Zhong<sup>2</sup>, Yu Liu<sup>2</sup>, Yubo Xiong<sup>2</sup>, Xingfeng Qiu<sup>2</sup>, Zhen, Zhang<sup>10</sup>, Heng Zhang<sup>11</sup>, Yongxiang Zhao<sup>11</sup>, Kaiguang Zhang<sup>†13</sup>, Xuehui Hong<sup>†2</sup>, Zhiyong Zhang<sup>†14</sup>

## **Appendix**

Table of contents

|                    |         |
|--------------------|---------|
| Appendix Table S1  | Page 2  |
| Appendix Table S2  | Page 3  |
| Appendix Table S3  | Page 4  |
| Appendix Table S4  | Page 12 |
| Appendix Table S5  | Page 13 |
| Appendix Table S6  | Page 24 |
| Appendix Table S7  | Page 25 |
| Appendix Table S8  | Page 26 |
| Appendix Figure S1 | Page 27 |
| Appendix Figure S2 | Page 28 |
| Appendix Figure S3 | Page 28 |
| Appendix Figure S4 | Page 29 |

**Appendix Table S1.** Relationship between UHMK1 expression and clinicopathological features of GC patients (n=100)

| variable                            | Relative UHMK1 Expression |             | P-value          |
|-------------------------------------|---------------------------|-------------|------------------|
|                                     | Low (n=44)                | High (n=56) |                  |
| <b>Age</b>                          |                           |             | NS               |
| ≤50                                 | 25                        | 26          |                  |
| >50                                 | 19                        | 30          |                  |
| <b>Gender</b>                       |                           |             | NS               |
| Male                                | 24                        | 33          |                  |
| Female                              | 20                        | 23          |                  |
| <b>Histological differentiation</b> |                           |             | NS               |
| Well/Moderately                     | 28                        | 28          |                  |
| Poorly                              | 16                        | 28          |                  |
| <b>Tumor size</b>                   |                           |             | <b>P&lt;0.05</b> |
| ≤5cm                                | 31                        | 24          |                  |
| >5cm                                | 13                        | 32          |                  |
| <b>Distant metastasis</b>           |                           |             | <b>P&lt;0.05</b> |
| Yes                                 | 5                         | 18          |                  |
| No                                  | 39                        | 38          |                  |
| <b>Tumor stage</b>                  |                           |             | <b>P&lt;0.05</b> |
| I-II                                | 27                        | 21          |                  |
| III-IV                              | 17                        | 35          |                  |
| <b>Lymphatic invasion</b>           |                           |             | <b>P&lt;0.05</b> |
| Yes                                 | 18                        | 35          |                  |
| No                                  | 26                        | 21          |                  |
| <b>Vascular invasion</b>            |                           |             | NS               |
| Yes                                 | 19                        | 30          |                  |
| No                                  | 25                        | 26          |                  |
| <b><i>H.pylori</i> infection</b>    |                           |             | <b>P&lt;0.05</b> |
| Yes                                 | 18                        | 34          |                  |
| No                                  | 26                        | 22          |                  |

Note: GC patients were divided into UHMK1 high group and low group according to the analysis of qRT-PCR detection. NS, not significant between different groups. Differences among variables were evaluated by  $\chi^2$  or Fisher's exact  $\chi^2$ -test.

**Appendix Table S2.** Univariate and multivariate analysis of factors associated with survival in GC patients (n=100)

| Variable                            | Univariate analysis |              | multivariate analysis |              |
|-------------------------------------|---------------------|--------------|-----------------------|--------------|
|                                     | HR (95% CI)         | P-value      | HR (95% CI)           | P-value      |
| <b>Gender</b>                       |                     |              |                       |              |
| Male vs. Female                     | 0.800(0.488-1.311)  | 0.375        |                       |              |
| <b>Age</b>                          |                     |              |                       |              |
| ≤50 vs. >50                         | 1.030(0.636-1.670)  | 0.903        |                       |              |
| <b>Histological differentiation</b> |                     |              |                       |              |
| Well/Moderately vs. Poorly          | 1.118(0.726-1.916)  | 0.504        |                       |              |
| <b>Tumor size</b>                   |                     |              |                       |              |
| ≤5cm vs. >5cm                       | 1.707(1.049-2.775)  | <b>0.031</b> |                       |              |
| <b>Distant metastasis</b>           |                     |              |                       |              |
| Yes vs. No                          | 2.256(1.328-3.832)  | <b>0.003</b> | 1.836(1.049-3.214)    | <b>0.033</b> |
| <b>Tumor stage</b>                  |                     |              |                       |              |
| I-II vs. III-IV                     | 1.693(1.030-2.782)  | <b>0.038</b> |                       |              |
| <b>Lymphatic invasion</b>           |                     |              |                       |              |
| Yes vs. No                          | 1.625(0.991-2.666)  | 0.055        |                       |              |
| <b>Vascular invasion</b>            |                     |              |                       |              |
| Yes vs. No                          | 1.236(0.762-2.004)  | 0.391        |                       |              |
| <b>H.pylori infection</b>           |                     |              |                       |              |
| Positive vs. Negative               | 1.808(1.104-2.961)  | <b>0.019</b> | 1.864(1.109-3.187)    | <b>0.023</b> |
| <b>UHMK1 expression</b>             |                     |              |                       |              |
| High vs. Low                        | 3.104(1.808-5.328)  | <b>0.001</b> | 1.977(1.085-3.603)    | <b>0.026</b> |

**Appendix Table S3. UHMK1 related top 500 differentially expressed genes in GC**

## Top 500 genes upregulated

| gene       | logFC     | adj. P<br>value | gene     | logFC     | adj. P<br>value | gene      | logFC     | adj. P<br>value |
|------------|-----------|-----------------|----------|-----------|-----------------|-----------|-----------|-----------------|
| UHMK1      | 2.4000218 | 2.044E-73       | HIPK1    | 0.9530314 | 6.172E-29       | TMEM184C  | 0.6328096 | 2.991E-25       |
| NHLRC2     | 1.3161737 | 3.086E-43       | ADAR     | 0.7407452 | 6.775E-29       | ZNF81     | 1.0044275 | 3.148E-25       |
| ANKRD36BP1 | 1.8001811 | 4.968E-43       | KIF2A    | 0.9948283 | 8.529E-29       | REL       | 0.9587622 | 3.117E-25       |
| SFT2D2     | 1.2489058 | 9.74E-40        | PTPLB    | 1.3651592 | 1.18E-28        | ZNF678    | 1.2524419 | 3.103E-25       |
| ASXL2      | 1.387653  | 6.198E-39       | C9orf102 | 1.2811579 | 1.2E-28         | CNOT1     | 0.7926673 | 3.139E-25       |
| DENND1B    | 1.6793154 | 5.47E-37        | AP1G1    | 0.8042917 | 2.067E-28       | POLR3A    | 0.9392427 | 3.503E-25       |
| C22orf30   | 0.909826  | 4.791E-37       | TRIP12   | 0.7578423 | 9.807E-28       | MPHOSPH9  | 1.0031505 | 4.225E-25       |
| TAOK1      | 1.4673326 | 1.197E-36       | CLTC     | 0.6839019 | 1.338E-27       | IREB2     | 0.7391494 | 4.425E-25       |
| MAP3K2     | 1.0038034 | 2.114E-35       | RASA2    | 1.1907286 | 2.23E-27        | FAM199X   | 0.823473  | 4.519E-25       |
| SPTY2D1    | 0.7876738 | 4.669E-35       | ZDHHC20  | 1.4325445 | 2.488E-27       | PDS5A     | 0.6371682 | 5.834E-25       |
| IDE        | 1.0851064 | 6.143E-35       | RSPRY1   | 0.8739165 | 2.936E-27       | ETV3      | 1.1455421 | 7.126E-25       |
| STRN       | 1.1206    | 6.803E-35       | TMEM48   | 1.2371771 | 3.896E-27       | C9orf41   | 1.1300585 | 7.677E-25       |
| ADAM10     | 1.1559253 | 1.217E-34       | KLHDC10  | 0.9600864 | 5.29E-27        | FBXL4     | 0.8323583 | 8.588E-25       |
| MOBKL1B    | 0.792599  | 4.82E-34        | EDEM1    | 0.9311928 | 6.18E-27        | ANAPC1    | 0.9275185 | 1.053E-24       |
| RC3H2      | 1.1281025 | 6.309E-34       | EYA3     | 1.1009207 | 1.008E-26       | PLEKHB2   | 0.7164953 | 1.06E-24        |
| RBBP5      | 0.9266372 | 9.786E-34       | RFX3     | 1.5337798 | 1.231E-26       | MGAT5     | 1.6302772 | 1.174E-24       |
| C1orf58    | 1.185804  | 5.845E-33       | KIAA0317 | 0.7192506 | 1.246E-26       | STAG1     | 0.8019166 | 1.185E-24       |
| BARD1      | 1.3805954 | 1.168E-32       | BIRC6    | 0.835761  | 1.396E-26       | CDK12     | 0.8030107 | 1.493E-24       |
| GTF2A1     | 1.2412344 | 1.01E-31        | ATP6V1A  | 0.6654869 | 1.549E-26       | GTF2H3    | 0.8975051 | 1.503E-24       |
| IPMK       | 1.5119633 | 9.804E-32       | PAFAH1B2 | 0.9683713 | 1.812E-26       | RALGAPA2  | 1.3613737 | 1.641E-24       |
| HEATR5A    | 0.905195  | 1.885E-31       | ATIC     | 1.621867  | 2.302E-26       | KIAA2018  | 0.8189621 | 1.977E-24       |
| STT3B      | 1.0303327 | 3.04E-31        | C9orf129 | 1.362427  | 3.014E-26       | KIAA0100  | 0.7416497 | 2.549E-24       |
| SLC30A6    | 0.9984082 | 3.817E-31       | RIF1     | 0.8712397 | 3.05E-26        | SLC30A1   | 0.9482514 | 2.783E-24       |
| LRBA       | 0.956573  | 4.444E-31       | BRWD3    | 1.2154355 | 4.118E-26       | CLCN3     | 1.1122852 | 2.788E-24       |
| PDZD8      | 1.3829544 | 4.487E-31       | UEVLD    | 0.8935806 | 5.442E-26       | GMCL1     | 0.8660903 | 2.822E-24       |
| NCOA2      | 1.4314557 | 8.495E-31       | SLC31A1  | 0.9505428 | 6.795E-26       | BRIP1     | 1.4646701 | 3.637E-24       |
| CEP97      | 1.2143757 | 1.349E-30       | ATE1     | 1.1071539 | 9.171E-26       | GTF2I     | 0.8718274 | 3.812E-24       |
| CCNT1      | 1.3499531 | 2.991E-30       | DDI2     | 1.3451586 | 1.419E-25       | NUP98     | 0.6585367 | 4.687E-24       |
| RAPGEF6    | 1.2301429 | 3.249E-30       | NBEAL1   | 1.479392  | 1.565E-25       | TNPO1     | 0.610642  | 4.672E-24       |
| C10orf12   | 1.1703076 | 4.2E-30         | SETX     | 0.8505129 | 1.543E-25       | ASCC3     | 0.8762151 | 5.308E-24       |
| ZBTB41     | 0.9959707 | 1.047E-29       | TMPPE    | 1.152866  | 1.546E-25       | UBR2      | 0.9132527 | 5.44E-24        |
| ATF6       | 0.7109123 | 1.103E-29       | CDC14C   | 1.3054607 | 1.763E-25       | DNAJB14   | 0.7432964 | 6.805E-24       |
| MED13      | 0.9099892 | 1.114E-29       | MBNL3    | 1.834858  | 2.081E-25       | VPS13B    | 0.8397101 | 8.077E-24       |
| PUS7L      | 1.0692045 | 1.128E-29       | XRN1     | 0.9438384 | 2.055E-25       | HEATR5B   | 0.6652618 | 8.154E-24       |
| CEP350     | 0.8931274 | 1.108E-29       | LATS1    | 0.9592099 | 2.23E-25        | LNPEP     | 1.3006619 | 9.468E-24       |
| GTF3C4     | 1.0682798 | 1.922E-29       | AVL9     | 0.947364  | 2.251E-25       | LOC284441 | 1.1998469 | 1.005E-23       |
| MAN2A1     | 1.2090687 | 2.965E-29       | ELK4     | 0.7739442 | 2.568E-25       | PPP1R15B  | 0.634379  | 1.197E-23       |
| SGK196     | 1.7160869 | 3.056E-29       | SPTLC2   | 0.8776674 | 2.84E-25        | MCM9      | 0.8965165 | 1.787E-23       |
| PANK3      | 1.0910574 | 3.445E-29       | DHX9     | 0.5811611 | 3.023E-25       | LRRC8B    | 0.7825015 | 2.275E-23       |
| gene       | logFC     | adj. P          | gene     | logFC     | adj. P          | ALMS1     | 0.8679354 | 2.425E-23       |
|            |           |                 |          |           |                 | RSC1A1    | 0.9401114 | 2.745E-23       |
|            |           |                 |          |           |                 | FRK       | 1.5865505 | 2.89E-23        |

|          |           |           |           |           |           |          |           |           |
|----------|-----------|-----------|-----------|-----------|-----------|----------|-----------|-----------|
| ZNF619   | 0.8370897 | 4.548E-23 | ZNF770    | 0.6898259 | 5.313E-21 | SPATA13  | 1.1457412 | 1.561E-19 |
| SMG1     | 0.8485956 | 4.975E-23 | POLR2B    | 0.5730563 | 5.413E-21 | GNPTAB   | 0.6653454 | 1.93E-19  |
| IGF2R    | 0.9424684 | 7.058E-23 | CAPRIN1   | 0.5712546 | 7.172E-21 | EPT1     | 0.8654129 | 1.943E-19 |
| GAN      | 1.2622266 | 9.419E-23 | SBNO1     | 0.7239773 | 7.235E-21 | KIAA1715 | 0.5901042 | 1.975E-19 |
| MAPK8    | 0.8389523 | 9.847E-23 | RLIM      | 0.6980406 | 7.267E-21 | PRKAR2A  | 0.8598004 | 2.126E-19 |
| PTPRJ    | 1.1381485 | 9.801E-23 | INO80D    | 0.6883839 | 7.707E-21 | GART     | 1.2140752 | 2.204E-19 |
| TOR1AIP2 | 1.0065199 | 1.02E-22  | SCYL2     | 0.7090304 | 8.799E-21 | INTS2    | 0.7073429 | 2.731E-19 |
| URB2     | 0.8638302 | 1.055E-22 | LMBRD2    | 1.0419302 | 8.857E-21 | TRIP11   | 0.6441355 | 3.061E-19 |
| DDX3X    | 0.6251061 | 1.112E-22 | MTOR      | 0.7111882 | 1.01E-20  | NUFIP2   | 0.558453  | 3.216E-19 |
| SMG7     | 0.5671699 | 1.188E-22 | COPB1     | 0.5697791 | 1.017E-20 | RBL1     | 1.0082697 | 3.336E-19 |
| USP24    | 0.6771454 | 1.315E-22 | RBM15     | 0.6756147 | 1.033E-20 | ASH1L    | 0.7331325 | 3.63E-19  |
| DHX8     | 0.6240093 | 1.379E-22 | UHRF1BP1  | 0.7365303 | 1.067E-20 | ACTR8    | 0.5041095 | 3.859E-19 |
| MED1     | 0.8042572 | 1.43E-22  | PARP4     | 0.8285502 | 1.243E-20 | KLHL11   | 1.3033655 | 4.524E-19 |
| CLOCK    | 0.979051  | 2.386E-22 | AQR       | 0.5808321 | 1.355E-20 | SEL1L    | 0.6730485 | 5.347E-19 |
| PPTC7    | 0.9413065 | 2.448E-22 | TGFBRAP1  | 0.9202566 | 1.392E-20 | FMN1     | 1.681558  | 6.079E-19 |
| SEC24A   | 0.8077737 | 2.594E-22 | FBXW11    | 0.6676025 | 1.486E-20 | UTP20    | 0.7414295 | 6.529E-19 |
| ACAP2    | 0.6427453 | 3.142E-22 | KIAA1958  | 1.169563  | 1.69E-20  | SETD2    | 0.5961075 | 7.556E-19 |
| RBM12    | 0.4928092 | 3.277E-22 | PIKFYVE   | 0.7318107 | 1.792E-20 | CTDSPL2  | 0.6252622 | 7.942E-19 |
| EAF1     | 0.6482976 | 3.874E-22 | CPD       | 1.0876931 | 2.154E-20 | SEC16A   | 0.7300993 | 8.251E-19 |
| VPRBP    | 0.6063967 | 3.918E-22 | MMGT1     | 0.6625443 | 2.149E-20 | XPO4     | 0.770916  | 8.381E-19 |
| PPAT     | 1.2136772 | 4.893E-22 | RQCD1     | 0.7117332 | 2.444E-20 | DENND4A  | 0.805951  | 8.838E-19 |
| PDP2     | 0.8504752 | 5.105E-22 | KIAA0494  | 0.6145399 | 2.583E-20 | ZFP106   | 0.687137  | 9.018E-19 |
| ZNF484   | 0.8014699 | 6.429E-22 | 43530     | 0.7356534 | 2.594E-20 | KLHL18   | 0.5454983 | 9.027E-19 |
| SLC25A40 | 0.9650098 | 6.996E-22 | EPRS      | 0.6533141 | 2.7E-20   | ENTPD4   | 0.7501759 | 9.716E-19 |
| IBTK     | 0.8353649 | 7.065E-22 | ZNF460    | 1.1373267 | 2.721E-20 | TET2     | 0.7506727 | 9.895E-19 |
| CSNK1G1  | 0.6280766 | 7.076E-22 | SMC5      | 0.7488952 | 2.843E-20 | LIMS1    | 0.8113826 | 1.013E-18 |
| N4BP2    | 1.2541466 | 7.281E-22 | C20orf94  | 1.0869339 | 3.136E-20 | DIP2B    | 0.68738   | 1.014E-18 |
| RANBP2   | 0.7371729 | 9.986E-22 | UBE3C     | 0.5919234 | 3.243E-20 | DIAPH1   | 0.7377202 | 1.11E-18  |
| ATF2     | 0.8213289 | 1.087E-21 | MFSB9     | 0.7819983 | 3.89E-20  | SLC39A9  | 0.5231427 | 1.131E-18 |
| APAF1    | 0.7634362 | 1.119E-21 | IQGAP1    | 0.6940981 | 3.944E-20 | ERCC6    | 0.7324272 | 1.227E-18 |
| PRDM10   | 0.6369584 | 1.182E-21 | ISG20L2   | 0.6404436 | 4.12E-20  | ZZZ3     | 0.52416   | 1.242E-18 |
| RNF111   | 0.5963893 | 1.275E-21 | LCOR      | 0.9856684 | 4.105E-20 | PIK3R4   | 0.5676919 | 1.246E-18 |
| DCUN1D1  | 0.7081318 | 1.402E-21 | HELZ      | 0.6112895 | 5.319E-20 | ADSL     | 1.0274341 | 1.337E-18 |
| SPG11    | 0.6658187 | 1.396E-21 | ZNF800    | 0.6399907 | 5.774E-20 | PSME4    | 0.591024  | 1.349E-18 |
| ZNF41    | 0.638438  | 1.444E-21 | C1orf163  | 0.7047422 | 5.838E-20 | ZCCHC6   | 0.6253278 | 1.645E-18 |
| FKBP15   | 0.5649523 | 1.567E-21 | CPSF2     | 0.5590333 | 7.06E-20  | RLF      | 0.6157705 | 1.706E-18 |
| ROD1     | 0.7489587 | 1.61E-21  | FAM102B   | 0.9152397 | 7.427E-20 | NBAS     | 0.7214519 | 2.106E-18 |
| NEU3     | 0.9954672 | 1.75E-21  | LASS6     | 1.0500063 | 7.46E-20  | RABGAP1L | 0.7911188 | 2.146E-18 |
| GPRIN3   | 1.8284328 | 1.751E-21 | ZNF699    | 1.4274288 | 8.272E-20 | CTCF     | 0.3619852 | 2.14E-18  |
| ADAT1    | 0.8105047 | 1.875E-21 | AP2B1     | 0.6912921 | 8.556E-20 | KIAA1109 | 0.8068943 | 2.219E-18 |
| CAND1    | 0.7638659 | 3.626E-21 | ATR       | 0.8055855 | 9.552E-20 | HIPK3    | 1.0745277 | 2.327E-18 |
| DCLRE1A  | 0.8145676 | 3.753E-21 | C10orf118 | 0.9006365 | 1.071E-19 | SNRNP200 | 0.644248  | 2.318E-18 |
| SEC23IP  | 0.6178249 | 3.919E-21 | KDM4A     | 0.5934932 | 1.151E-19 | NPAT     | 0.690592  | 2.331E-18 |
| DOCK7    | 0.7654935 | 4.453E-21 | SEL1L3    | 0.9759881 | 1.172E-19 | STARD4   | 1.2775374 | 2.353E-18 |
| KCTD20   | 0.7979825 | 4.466E-21 | PALB2     | 0.6549874 | 1.172E-19 | TOPBP1   | 0.7195635 | 2.559E-18 |
| WAPAL    | 0.6012358 | 5.265E-21 | DHX15     | 0.5762793 | 1.32E-19  | TBC1D5   | 0.6498546 | 3.044E-18 |

|          |           |           |          |           |           |          |           |           |
|----------|-----------|-----------|----------|-----------|-----------|----------|-----------|-----------|
| KIAA0947 | 0.7025393 | 3.18E-18  | FAM45B   | 0.7527754 | 1.381E-17 | ASAH2B   | 1.963869  | 1.556E-16 |
| FOXN2    | 0.7033758 | 3.241E-18 | ALG10    | 0.8271822 | 1.655E-17 | SPTBN1   | 0.8367197 | 1.641E-16 |
| MTF1     | 0.5647801 | 3.323E-18 | BTAF1    | 0.8126863 | 1.679E-17 | PI4K2B   | 0.6893848 | 1.691E-16 |
| ZBTB37   | 1.0366886 | 3.387E-18 | IPO11    | 0.5742801 | 2.173E-17 | WRN      | 0.7432747 | 1.748E-16 |
| CHUK     | 0.6240544 | 3.396E-18 | ZNF192   | 0.9595774 | 2.179E-17 | LPGAT1   | 0.724762  | 1.743E-16 |
| QTRTD1   | 0.5454608 | 3.42E-18  | FAM73A   | 0.7638516 | 2.353E-17 | MSI2     | 0.8720946 | 1.938E-16 |
| MFAP3    | 0.5282795 | 3.523E-18 | GSK3B    | 0.4784307 | 2.371E-17 | FNDC3A   | 0.6829733 | 2.475E-16 |
| STIL     | 1.1852174 | 3.617E-18 | WDR7     | 0.7927071 | 2.381E-17 | DNAJC3   | 0.5484379 | 2.571E-16 |
| PRRC1    | 0.5628554 | 3.614E-18 | BMP2K    | 0.8172116 | 2.429E-17 | HECTD1   | 0.5508082 | 2.683E-16 |
| SSH2     | 0.7764629 | 3.606E-18 | SERINC5  | 1.3531302 | 2.685E-17 | CHD8     | 0.4784602 | 2.759E-16 |
| ARFGEF1  | 0.7806325 | 3.781E-18 | SF3A1    | 0.4162869 | 2.694E-17 | WDFY1    | 0.5928    | 2.81E-16  |
| LARP4    | 0.6826046 | 3.96E-18  | COPB2    | 0.5251289 | 2.849E-17 | ANKFY1   | 0.5944399 | 3.245E-16 |
| ABHD2    | 1.2646957 | 4.604E-18 | TRPM7    | 0.6852402 | 2.921E-17 | NUPL1    | 0.6237633 | 3.326E-16 |
| MTMR4    | 0.6288162 | 4.913E-18 | DNAJC13  | 0.580492  | 3.009E-17 | SF3B1    | 0.5480818 | 3.354E-16 |
| NUP155   | 0.9578863 | 5.214E-18 | PIK3CB   | 0.6398871 | 3.335E-17 | TFRC     | 1.1283161 | 3.357E-16 |
| USP32    | 0.5558164 | 5.196E-18 | NSUN3    | 0.7009751 | 3.448E-17 | TBL1XR1  | 0.6497281 | 3.462E-16 |
| SLC30A9  | 0.5344999 | 5.371E-18 | DDX21    | 0.7031014 | 3.587E-17 | CTAGE1   | 1.0511673 | 3.549E-16 |
| KIF4B    | 1.2712464 | 5.76E-18  | GPD2     | 0.7886559 | 4.284E-17 | KDM3B    | 0.5079985 | 3.725E-16 |
| PRKDC    | 0.8194073 | 5.797E-18 | NSD1     | 0.6132135 | 4.375E-17 | RFX7     | 0.7035135 | 3.819E-16 |
| SEC24B   | 0.5217742 | 6.09E-18  | TMEM2    | 0.9775282 | 4.362E-17 | RREB1    | 0.6903584 | 4.321E-16 |
| MPZL3    | 1.3730154 | 6.624E-18 | TM9SF2   | 0.701501  | 4.439E-17 | CNNM4    | 0.9939645 | 4.511E-16 |
| AP4E1    | 0.6202797 | 6.647E-18 | POLR1A   | 0.716721  | 4.601E-17 | ATXN7    | 0.5416866 | 4.523E-16 |
| REST     | 0.5443734 | 6.775E-18 | G3BP2    | 0.5416574 | 4.599E-17 | C2CD3    | 0.5611609 | 4.573E-16 |
| PGM3     | 0.8831538 | 7.358E-18 | CSNK2A1P | 0.6906516 | 5.194E-17 | DPP8     | 0.5445881 | 4.621E-16 |
| ZFP91    | 0.4290525 | 7.799E-18 | NIPA1    | 0.6997826 | 5.57E-17  | LARS2    | 0.6635522 | 4.754E-16 |
| FNIP2    | 0.8610446 | 7.823E-18 | BTBD8    | 1.3538041 | 6.115E-17 | ATP2A2   | 0.475559  | 5.104E-16 |
| NSF      | 0.6647775 | 8.245E-18 | ARFGEF2  | 0.7628006 | 6.312E-17 | DYRK2    | 0.7156478 | 5.182E-16 |
| HTT      | 0.6916441 | 8.344E-18 | SMARCA5  | 0.5403742 | 6.52E-17  | ERLIN1   | 0.6661009 | 5.449E-16 |
| FKTN     | 0.6710692 | 8.316E-18 | CENPI    | 1.3031027 | 6.579E-17 | RNF213   | 0.9327672 | 5.49E-16  |
| HEATR1   | 0.7168909 | 8.351E-18 | TMED5    | 0.5684286 | 7.518E-17 | GMCL1L   | 1.2875447 | 6.849E-16 |
| LIMD1    | 0.6542044 | 8.661E-18 | TUBGCP4  | 0.5802599 | 7.617E-17 | PPP4R2   | 0.5958449 | 7.056E-16 |
| ERMP1    | 1.0156618 | 8.807E-18 | STXBP5   | 0.8058563 | 7.883E-17 | ARAP2    | 1.0668953 | 7.109E-16 |
| SFRS2IP  | 0.5245054 | 1.029E-17 | TGOLN2   | 0.6085787 | 8.158E-17 | GAPVD1   | 0.5022573 | 7.623E-16 |
| NUP205   | 0.7207926 | 1.035E-17 | FUBP1    | 0.5238287 | 9.709E-17 | CDKL5    | 1.3466473 | 7.825E-16 |
| UBR1     | 0.6980804 | 1.051E-17 | PUM1     | 0.3592088 | 9.736E-17 | NCAPD3   | 0.8126927 | 8.712E-16 |
| MYSM1    | 0.9400762 | 1.138E-17 | EIF2AK3  | 0.6127188 | 9.726E-17 | SLC35A5  | 0.5923324 | 9.602E-16 |
| UBQLN1   | 0.4942418 | 1.182E-17 | SH3RF1   | 0.8731329 | 1.004E-16 | NLN      | 0.7838389 | 9.902E-16 |
| ROCK2    | 0.8630819 | 1.18E-17  | IL6ST    | 1.4021001 | 1.005E-16 | ARHGEF12 | 0.5301204 | 1.001E-15 |
| SLC30A5  | 0.4487112 | 1.195E-17 | BRAF     | 0.7710247 | 1.058E-16 | SPPL2A   | 0.5833979 | 1.092E-15 |
| LMTK2    | 1.1768241 | 1.197E-17 | NDUFS1   | 0.5553454 | 1.067E-16 | RASEF    | 1.7257407 | 1.11E-15  |
| SHPRH    | 1.0533896 | 1.2E-17   | OSBP     | 0.4339179 | 1.065E-16 | PIK3CA   | 0.703236  | 1.256E-15 |
| HUWE1    | 0.5896624 | 1.235E-17 | HPS5     | 0.6092356 | 1.116E-16 | CNOT6L   | 0.5899587 | 1.274E-15 |
| RRM1     | 0.6869498 | 1.253E-17 | BAG4     | 0.897102  | 1.177E-16 | NAA50    | 0.5389056 | 1.274E-15 |
| CDC27    | 0.5188291 | 1.26E-17  | DR1      | 0.4588871 | 1.203E-16 | DHX33    | 0.7574955 | 1.282E-15 |
| FAT1     | 1.044697  | 1.268E-17 | SLC9A7   | 1.5430361 | 1.24E-16  | PDPK1    | 0.5616041 | 1.319E-15 |
| YIPF6    | 0.6378656 | 1.349E-17 | KIAA1632 | 0.7372292 | 1.488E-16 | NCBP1    | 0.5639412 | 1.375E-15 |

|          |           |           |           |           |           |           |           |           |
|----------|-----------|-----------|-----------|-----------|-----------|-----------|-----------|-----------|
| INTS7    | 0.6083912 | 1.394E-15 | TP53BP1   | 0.565024  | 4.97E-15  | MFHAS1    | 0.8689751 | 2.116E-14 |
| GOSR1    | 0.3784716 | 1.49E-15  | SEC23B    | 0.6658158 | 5.24E-15  | FGD4      | 0.8379665 | 2.126E-14 |
| NRAS     | 0.618176  | 1.505E-15 | CBL       | 0.6493016 | 5.568E-15 | ARHGAP11B | 1.2058354 | 2.129E-14 |
| EDEM3    | 0.9222087 | 1.605E-15 | SMCR8     | 0.6700403 | 5.662E-15 | RBMXL1    | 0.4584505 | 2.155E-14 |
| NUP160   | 0.6022887 | 1.624E-15 | NF1       | 0.5652314 | 5.829E-15 | SLC33A1   | 0.5573013 | 2.218E-14 |
| DMXL2    | 0.8203279 | 1.719E-15 | PDXDC1    | 0.5955602 | 6.162E-15 | FOXJ3     | 0.519847  | 2.225E-14 |
| MFSD6    | 0.7323377 | 1.715E-15 | ZKSCAN1   | 0.8885373 | 6.259E-15 | PLCXD2    | 0.8811793 | 2.306E-14 |
| NIPAL2   | 1.0275282 | 1.787E-15 | AP3B1     | 0.4655733 | 6.321E-15 | 57714     | 0.9536393 | 2.317E-14 |
| CD2AP    | 0.8166448 | 1.93E-15  | ATF7IP    | 0.6343516 | 6.379E-15 | TTC37     | 0.7508069 | 2.367E-14 |
| KIAA0586 | 0.5987422 | 1.926E-15 | LEPROT    | 0.8302925 | 6.528E-15 | EP300     | 0.4102693 | 2.366E-14 |
| ITGA6    | 0.9838335 | 1.98E-15  | SLC35A3   | 0.8944533 | 6.715E-15 | NUP133    | 0.5134086 | 2.374E-14 |
| VPS13C   | 0.7518527 | 2.08E-15  | TCF20     | 0.6159907 | 7.236E-15 | EMR2      | 1.2138997 | 2.478E-14 |
| BTBD1    | 0.4695351 | 2.396E-15 | SLC5A3    | 0.7839411 | 7.31E-15  | QRICH1    | 0.3708178 | 2.703E-14 |
| DGKH     | 1.1475872 | 2.415E-15 | C14orf21  | 0.7457484 | 7.354E-15 | ITCH      | 0.4749164 | 2.715E-14 |
| MTMR1    | 0.5077666 | 2.419E-15 | CD84      | 1.6914447 | 7.745E-15 | RAB14     | 0.4325738 | 2.72E-14  |
| RAD18    | 0.7306809 | 2.613E-15 | HELB      | 1.0347354 | 7.846E-15 | DDB1      | 0.4479016 | 2.718E-14 |
| TNPO3    | 0.4451733 | 2.872E-15 | PHF6      | 0.6609087 | 8.438E-15 | EHF       | 1.5088519 | 2.752E-14 |
| NFXL1    | 0.7104029 | 2.96E-15  | PLEKHA7   | 0.8810731 | 8.648E-15 | SUCNR1    | 2.0853095 | 2.786E-14 |
| USP1     | 0.5433327 | 2.973E-15 | ADNP2     | 0.6439617 | 9.008E-15 | DCTN5     | 0.4582491 | 2.93E-14  |
| MUT      | 0.5211166 | 3.194E-15 | WDR11     | 0.5330979 | 9.338E-15 | MANEA     | 0.7051    | 2.992E-14 |
| MYST3    | 0.5371385 | 3.291E-15 | LCORL     | 0.6590242 | 1.004E-14 | CCDC21    | 0.7222294 | 3.155E-14 |
| TMOD3    | 0.512109  | 3.366E-15 | TTBK2     | 1.0777733 | 1.051E-14 | RFWD3     | 0.6447155 | 3.166E-14 |
| WDR76    | 0.8392711 | 3.538E-15 | KIAA1804  | 1.0600231 | 1.05E-14  | DICER1    | 0.5522122 | 3.221E-14 |
| RAB27B   | 1.9997532 | 3.54E-15  | SMCHD1    | 0.6769025 | 1.077E-14 | PLXNC1    | 1.7734766 | 3.24E-14  |
| PIGN     | 0.7479326 | 3.569E-15 | MON1B     | 0.534154  | 1.11E-14  | HMGCR     | 0.7873399 | 3.287E-14 |
| FRYL     | 0.7503661 | 3.564E-15 | MOSPD2    | 0.7035593 | 1.299E-14 | ZBTB5     | 0.6401336 | 3.281E-14 |
| TTF2     | 0.7179287 | 3.608E-15 | TMF1      | 0.5674536 | 1.326E-14 | APPL1     | 0.5169293 | 3.422E-14 |
| RTTN     | 0.8429029 | 3.737E-15 | C14orf118 | 0.5799249 | 1.613E-14 | USP33     | 0.4464995 | 3.45E-14  |
| CPNE3    | 0.6140078 | 3.787E-15 | GAS2L3    | 1.1794478 | 1.709E-14 | RHBDD1    | 0.5256043 | 3.604E-14 |
| GNS      | 0.6970842 | 3.848E-15 | INO80     | 0.38618   | 1.88E-14  | ZNF148    | 0.4670945 | 3.755E-14 |
| SAMD8    | 0.8835312 | 3.969E-15 | ZBTB6     | 0.5760469 | 1.887E-14 | KBTBD4    | 0.5738921 | 3.97E-14  |
| FUT10    | 0.7890463 | 3.981E-15 | PTPRG     | 0.9940412 | 1.903E-14 | GPATCH8   | 0.4330936 | 4.011E-14 |
| EXOC6    | 0.6229367 | 4.075E-15 | VPS13D    | 0.6688274 | 1.938E-14 | EIF2C2    | 0.783575  | 4.145E-14 |
| PRPF8    | 0.5815694 | 4.266E-15 | SMCR7L    | 0.4336673 | 1.954E-14 | ZNF121    | 0.8322075 | 4.225E-14 |
| CXorf38  | 0.7451763 | 4.39E-15  | MADD      | 0.5379461 | 2.06E-14  |           |           |           |

Top 500 genes downregulated

| gene       | logFC     | adj. P value | gene     | logFC     | adj. P value | gene      | logFC     | adj. P value |
|------------|-----------|--------------|----------|-----------|--------------|-----------|-----------|--------------|
| NDUFA3     | -1.414433 | 4.116E-32    | GABARAP  | -0.752319 | 1.772E-24    | COMMD1    | -0.786559 | 4.4E-22      |
| COMMD6     | -1.169603 | 2.524E-32    | RPL27A   | -1.004193 | 1.772E-24    | NDUFB8    | -0.714299 | 4.59E-22     |
| PRR24      | -1.412302 | 2.14E-32     | FAM128B  | -1.013756 | 2.215E-24    | UBL5      | -0.692747 | 5.172E-22    |
| MYEOV2     | -0.973756 | 3.249E-31    | ZNF414   | -0.802528 | 3.043E-24    | HCFC1R1   | -1.070875 | 6.113E-22    |
| C1orf86    | -1.117663 | 2.339E-30    | FDX1L    | -0.785018 | 3.269E-24    | C17orf49  | -0.788063 | 7.046E-22    |
| THAP3      | -1.029667 | 6.72E-30     | ROMO1    | -0.994893 | 3.861E-24    | NDUFS5    | -0.824905 | 7.267E-22    |
| LIN37      | -0.928874 | 2.648E-29    | CCDC85B  | -1.190244 | 5.085E-24    | POLR2F    | -0.801491 | 7.51E-22     |
| BCL7C      | -1.142575 | 4.385E-29    | TBCB     | -0.856676 | 7.123E-24    | ATP6V1F   | -0.792494 | 7.508E-22    |
| TRAPPC1    | -0.885406 | 4.85E-29     | RP9      | -1.077618 | 8.643E-24    | DNLZ      | -1.078668 | 7.545E-22    |
| SCAND1     | -1.119013 | 4.856E-29    | PTMS     | -1.309071 | 8.825E-24    | MED19     | -0.821285 | 1.274E-21    |
| RNF181     | -0.962048 | 6.336E-29    | NDUFA11  | -0.852834 | 8.744E-24    | DNAJC17   | -0.680339 | 1.419E-21    |
| OST4       | -1.054574 | 6.844E-29    | BGLAP    | -1.364138 | 1.215E-23    | ZNF688    | -0.881192 | 1.642E-21    |
| NDUFA13    | -0.851127 | 2.319E-28    | TOMM7    | -1.030072 | 1.345E-23    | C14orf156 | -0.992456 | 1.962E-21    |
| SNORD17    | -2.246153 | 4.148E-28    | C19orf56 | -0.635234 | 1.56E-23     | RPL23A    | -0.926483 | 1.95E-21     |
| NDUFB7     | -0.98414  | 1.267E-27    | C19orf70 | -0.881741 | 1.756E-23    | SIVA1     | -0.775418 | 2.492E-21    |
| NDUFS8     | -1.099276 | 1.63E-27     | RPL28    | -1.127002 | 2.195E-23    | USE1      | -0.809046 | 2.469E-21    |
| CCS        | -0.743418 | 4.409E-27    | PPP1R14A | -2.223525 | 3.105E-23    | C16orf13  | -0.91468  | 4.119E-21    |
| ATOX1      | -0.957082 | 4.742E-27    | COX17    | -0.903163 | 3.162E-23    | LOC440957 | -0.991133 | 4.246E-21    |
| RNASEK     | -0.898542 | 1.596E-26    | ATP5G2   | -0.832715 | 3.192E-23    | MPV17     | -0.786415 | 4.541E-21    |
| NCRNA00116 | -1.231589 | 1.866E-26    | C1orf123 | -0.762674 | 3.396E-23    | RHEB      | -0.689893 | 4.838E-21    |
| C17orf61   | -1.20831  | 2.201E-26    | ZNF580   | -0.994109 | 3.611E-23    | COX7A1    | -1.616037 | 5.114E-21    |
| RNASEH2C   | -0.87625  | 2.601E-26    | MOB2     | -0.791889 | 3.893E-23    | CEBPD     | -1.164032 | 5.07E-21     |
| PFN1       | -0.798378 | 3.546E-26    | NDUFB4   | -0.753773 | 5.152E-23    | RPL36     | -1.018865 | 5.541E-21    |
| GPS2       | -0.801709 | 4.11E-26     | RPS19BP1 | -0.74725  | 5.077E-23    | C11orf10  | -0.752305 | 5.739E-21    |
| RPL38      | -1.115006 | 4.081E-26    | EGFL8    | -1.554236 | 6.959E-23    | SRP14     | -0.613222 | 6.418E-21    |
| MRPL53     | -0.94508  | 4.014E-26    | ZNF358   | -1.179073 | 8.254E-23    | SERF2     | -0.779767 | 6.752E-21    |
| LSMD1      | -1.051584 | 5.243E-26    | RPP21    | -0.945756 | 8.401E-23    | SYCE1L    | -2.014839 | 7.324E-21    |
| RPS20      | -1.041563 | 9.318E-26    | PABPN1   | -0.908371 | 9.005E-23    | RANGRF    | -0.833802 | 8.702E-21    |
| RPLP1      | -0.984141 | 1.098E-25    | NENF     | -0.970517 | 9.124E-23    | TMEM160   | -0.964229 | 8.967E-21    |
| POLR21     | -0.99393  | 1.228E-25    | RPL37A   | -0.925633 | 9.963E-23    | NDUFC1    | -0.892117 | 1.141E-20    |
| FKBP2      | -1.05687  | 1.389E-25    | MRPS24   | -0.792415 | 9.994E-23    | RPPH1     | -2.897785 | 1.616E-20    |
| UQCR11     | -0.89816  | 1.493E-25    | FAM127A  | -1.515525 | 1.058E-22    | RAB11B    | -0.692336 | 1.768E-20    |
| ARL2       | -0.882599 | 2.58E-25     | DYNLL1   | -0.657184 | 1.08E-22     | GNG5      | -0.692623 | 1.863E-20    |
| UBXN1      | -0.742044 | 3.047E-25    | PFDN5    | -0.76346  | 1.361E-22    | POLR2J    | -0.830453 | 1.897E-20    |
| DYNLRB1    | -0.939946 | 3.008E-25    | C19orf53 | -0.864573 | 1.419E-22    | TMEM91    | -1.148542 | 2.555E-20    |
| TRMT112    | -0.8587   | 3.885E-25    | MSRB2    | -1.062832 | 1.626E-22    | RPL13     | -0.950603 | 3.725E-20    |
| GADD45GIP1 | -0.913076 | 3.804E-25    | RP9P     | -1.114472 | 1.764E-22    | TMEM93    | -0.780741 | 3.709E-20    |
| C19orf43   | -0.86435  | 3.876E-25    | SNRNP35  | -0.669842 | 1.85E-22     | EXOSC1    | -0.674379 | 3.77E-20     |
| RPL39      | -1.672971 | 5.166E-25    | BANF1    | -0.90343  | 2.371E-22    | RAMP2     | -1.322499 | 4.274E-20    |
| HIGD2A     | -0.990014 | 6.703E-25    | JOSD2    | -1.004764 | 2.551E-22    | FBXL15    | -0.846775 | 4.526E-20    |
| EDF1       | -0.804574 | 9.263E-25    | RPLP2    | -0.973239 | 3.107E-22    | C17orf81  | -0.743932 | 4.579E-20    |
| gene       | logFC     | adj. P value | gene     | logFC     | adj. P value | ZMAT5     | -0.831134 | 4.653E-20    |
|            |           |              |          |           |              | RNU11     | -2.229883 | 5.095E-20    |
|            |           |              |          |           |              | FAM176B   | -1.211004 | 5.272E-20    |



|           |           |           |           |           |           |           |           |           |
|-----------|-----------|-----------|-----------|-----------|-----------|-----------|-----------|-----------|
| FAM89B    | -0.777965 | 5.362E-20 | PSENEB    | -0.892469 | 2.543E-18 | MRPL20    | -0.641387 | 2.023E-17 |
| RPL6      | -0.77861  | 5.762E-20 | PHPT1     | -0.851268 | 2.534E-18 | DNAJC30   | -0.647872 | 2.426E-17 |
| KRTCAP2   | -0.87906  | 8.051E-20 | SNHG6     | -1.096873 | 2.726E-18 | PIN4      | -0.888316 | 2.665E-17 |
| LENG1     | -0.759304 | 8.75E-20  | MYL6      | -0.845673 | 2.789E-18 | MAP1LC3A  | -1.262023 | 2.798E-17 |
| DRAP1     | -0.791341 | 9.234E-20 | VPS28     | -0.684005 | 3.062E-18 | FAM195B   | -1.019315 | 3.382E-17 |
| C17orf79  | -0.737216 | 9.337E-20 | PFDN1     | -0.510817 | 3.519E-18 | CCDC23    | -0.67924  | 3.413E-17 |
| POLR2L    | -0.832756 | 1.129E-19 | CCDC12    | -0.639681 | 3.686E-18 | HES4      | -1.384766 | 3.562E-17 |
| MRP63     | -0.776775 | 1.315E-19 | C7orf50   | -0.855397 | 4.079E-18 | C12orf45  | -0.78986  | 3.708E-17 |
| ATP5I     | -0.956589 | 1.426E-19 | PPDPF     | -1.028508 | 4.134E-18 | FUNDC2    | -0.636171 | 3.767E-17 |
| SURF2     | -0.895854 | 1.676E-19 | C11orf67  | -0.970226 | 4.64E-18  | TIMM17B   | -0.807045 | 3.831E-17 |
| RPS15     | -0.951586 | 1.682E-19 | NAT14     | -1.329364 | 5.056E-18 | LOC145474 | -1.323478 | 4.019E-17 |
| TRAPPC2L  | -0.761643 | 1.695E-19 | C14orf2   | -0.829147 | 5.188E-18 | FLOT1     | -0.671906 | 4.116E-17 |
| ARL6IP4   | -0.682211 | 1.921E-19 | C11orf48  | -0.751759 | 5.648E-18 | ARF5      | -0.608224 | 4.331E-17 |
| LIN7B     | -1.073737 | 2.212E-19 | COX5B     | -0.851842 | 5.658E-18 | YPEL3     | -0.99815  | 4.993E-17 |
| NDUFAF3   | -0.748428 | 2.42E-19  | NME4      | -1.191308 | 5.832E-18 | IFI27L2   | -1.104019 | 5.109E-17 |
| MIF       | -1.138297 | 2.696E-19 | SNHG9     | -1.513581 | 5.806E-18 | MRPL52    | -0.794087 | 5.495E-17 |
| SPAG7     | -0.618895 | 3.33E-19  | AURKAIP1  | -0.797953 | 5.914E-18 | IFITM3    | -1.046754 | 5.706E-17 |
| EEF1D     | -0.710027 | 3.391E-19 | DGUOK     | -0.652192 | 5.998E-18 | C4orf48   | -1.605594 | 6.215E-17 |
| MRPL55    | -0.74886  | 4.002E-19 | NDUFA7    | -0.772961 | 6.197E-18 | C9orf142  | -0.775945 | 6.528E-17 |
| BLOC1S1   | -0.776171 | 4.529E-19 | MRPL27    | -0.678722 | 6.193E-18 | LOC654342 | -1.264024 | 6.504E-17 |
| LOC144571 | -1.462063 | 5.472E-19 | SELM      | -1.577535 | 6.369E-18 | CCDC101   | -0.707926 | 6.499E-17 |
| USMG5     | -0.888461 | 5.581E-19 | BAD       | -0.723296 | 6.608E-18 | RPS27A    | -0.934031 | 6.513E-17 |
| COX6B1    | -0.872457 | 6.59E-19  | PRKCDBP   | -1.43764  | 6.594E-18 | PSMG4     | -0.767491 | 7.326E-17 |
| SCARNA7   | -2.197709 | 6.734E-19 | SSNA1     | -0.722509 | 7.623E-18 | C9orf16   | -1.009605 | 7.598E-17 |
| RAB13     | -0.938429 | 6.739E-19 | FAM104B   | -0.776379 | 7.878E-18 | PGLS      | -0.769961 | 7.614E-17 |
| CCDC107   | -0.937649 | 7.295E-19 | RPS17     | -0.831958 | 7.985E-18 | SIRT3     | -0.57053  | 8.084E-17 |
| RPS26P11  | -1.152752 | 7.946E-19 | UQCRQ     | -0.838478 | 7.951E-18 | C19orf24  | -0.779721 | 9.137E-17 |
| SCARNA10  | -1.711372 | 8.234E-19 | SHARPIN   | -0.691696 | 8.048E-18 | VEGFB     | -0.832113 | 9.257E-17 |
| HTRA2     | -0.674267 | 8.252E-19 | THAP7     | -0.70119  | 8.037E-18 | AP2S1     | -0.646591 | 9.394E-17 |
| TAF10     | -0.852721 | 8.264E-19 | TCEA2     | -1.39769  | 8.455E-18 | CBY1      | -0.718276 | 9.987E-17 |
| SNRPF     | -0.983921 | 9.49E-19  | EIF5B     | -0.832157 | 8.568E-18 | TMEM39B   | -0.569177 | 1.043E-16 |
| NDUFB1    | -0.804295 | 1.005E-18 | RPL35     | -0.941425 | 8.648E-18 | WDR74     | -0.691271 | 1.136E-16 |
| C22orf40  | -0.74093  | 1.019E-18 | ZCRB1     | -0.784194 | 8.837E-18 | FIS1      | -0.621754 | 1.342E-16 |
| PSMB6     | -0.618886 | 1.077E-18 | RBMX2     | -0.786451 | 9.023E-18 | RPL30     | -0.758052 | 1.416E-16 |
| UBA52     | -0.709927 | 1.183E-18 | COX16     | -0.679068 | 9.413E-18 | NDUFB11   | -0.742179 | 1.429E-16 |
| C7orf59   | -0.808875 | 1.331E-18 | TBCA      | -0.692105 | 1.062E-17 | RING1     | -0.641494 | 1.442E-16 |
| ATP5J     | -0.767271 | 1.338E-18 | TRAPPC5   | -0.72133  | 1.314E-17 | HIST1H4J  | -1.092409 | 1.451E-16 |
| ATP5J2    | -0.967403 | 1.555E-18 | ZNF428    | -0.941003 | 1.337E-17 | C7orf55   | -0.82983  | 1.448E-16 |
| RPL11     | -0.78421  | 1.596E-18 | C22orf32  | -0.708853 | 1.388E-17 | ZBTB8OS   | -0.712261 | 1.464E-16 |
| ZNF593    | -0.967191 | 1.676E-18 | MAF1      | -0.594882 | 1.413E-17 | RPAIN     | -0.646587 | 1.464E-16 |
| RPL35A    | -0.754671 | 1.692E-18 | HSPB1     | -1.491353 | 1.415E-17 | RPL32     | -0.77974  | 1.532E-16 |
| LOC388789 | -0.760701 | 1.815E-18 | C14orf153 | -0.543988 | 1.45E-17  | TIMM16    | -0.812472 | 1.54E-16  |
| SEC61B    | -0.697671 | 1.872E-18 | TIAF1     | -1.051419 | 1.668E-17 | CUEDC2    | -0.619987 | 1.536E-16 |
| CCDC72    | -0.791294 | 1.918E-18 | ALKBH7    | -0.879721 | 1.663E-17 | MYL6B     | -1.024188 | 1.597E-16 |
| RPS9      | -0.718728 | 2.362E-18 | PPP1R14B  | -0.913239 | 1.983E-17 | C2orf28   | -0.55817  | 1.721E-16 |
| C19orf60  | -0.703724 | 2.479E-18 | NOP10     | -0.713299 | 1.996E-17 | RNF7      | -0.580706 | 1.895E-16 |

|          |           |           |           |           |           |           |           |           |
|----------|-----------|-----------|-----------|-----------|-----------|-----------|-----------|-----------|
| C17orf89 | -0.84827  | 1.923E-16 | ATP5D     | -0.819548 | 9.666E-16 | MXD3      | -0.794233 | 3.829E-15 |
| PKIG     | -1.1102   | 2.069E-16 | SHFM1     | -0.867796 | 9.763E-16 | IDH3G     | -0.624943 | 4.095E-15 |
| RBX1     | -0.625432 | 2.234E-16 | ANAPC11   | -0.665109 | 9.82E-16  | RWDD1     | -0.653031 | 4.149E-15 |
| RFXANK   | -0.609738 | 2.574E-16 | FKBP8     | -0.658969 | 9.817E-16 | FAM167B   | -0.963932 | 4.311E-15 |
| FKBP1A   | -0.591948 | 2.569E-16 | ZRSR2     | -0.846899 | 9.842E-16 | RPL10     | -0.752435 | 4.329E-15 |
| MRPL36   | -0.760654 | 2.702E-16 | INO80B    | -0.766773 | 9.82E-16  | CCDC92    | -0.788836 | 4.319E-15 |
| C11orf83 | -0.780296 | 2.713E-16 | ISCU      | -0.555345 | 1.061E-15 | C2orf79   | -0.738635 | 4.648E-15 |
| COMMD4   | -0.570305 | 2.74E-16  | ZNHIT1    | -0.753117 | 1.059E-15 | COX4I2    | -1.113457 | 5.953E-15 |
| TMEM88   | -1.343852 | 2.833E-16 | NT5C      | -0.658068 | 1.077E-15 | RPL29     | -0.773823 | 6.124E-15 |
| HRAS     | -0.737422 | 2.876E-16 | RNF5      | -0.700717 | 1.082E-15 | FAM158A   | -0.754978 | 6.36E-15  |
| COX8A    | -0.716904 | 2.883E-16 | SYF2      | -0.596019 | 1.128E-15 | ATP5E     | -0.84745  | 6.815E-15 |
| QTRT1    | -0.733962 | 2.964E-16 | NDUFA2    | -0.629068 | 1.136E-15 | CAMTA1    | -0.626591 | 7.396E-15 |
| SEPW1    | -0.858235 | 3.037E-16 | C12orf10  | -0.575236 | 1.147E-15 | MDP1      | -0.584877 | 7.453E-15 |
| MEA1     | -0.683313 | 3.032E-16 | RPL22     | -0.69284  | 1.195E-15 | PLSCR3    | -0.698492 | 7.495E-15 |
| TMSB10   | -0.868311 | 3.037E-16 | VAMP2     | -0.815282 | 1.221E-15 | NDUFS6    | -0.75222  | 7.919E-15 |
| RPL37    | -0.933652 | 3.2E-16   | SNF8      | -0.541773 | 1.287E-15 | CUTA      | -0.607016 | 7.909E-15 |
| DPM3     | -0.916558 | 3.257E-16 | CYHR1     | -0.606948 | 1.373E-15 | NDUFAF2   | -0.724219 | 8.051E-15 |
| GLI4     | -0.939354 | 3.318E-16 | CHCHD10   | -1.123286 | 1.374E-15 | NFKBIL1   | -0.64686  | 8.051E-15 |
| RPL34    | -0.908903 | 3.488E-16 | PFND4     | -0.907571 | 1.402E-15 | C20orf199 | -0.935137 | 9.11E-15  |
| CCDC28B  | -0.945944 | 3.554E-16 | C8orf59   | -0.713087 | 1.412E-15 | MRPS21    | -0.859019 | 9.293E-15 |
| NDUFA12  | -0.664809 | 3.771E-16 | TMEM150A  | -0.698442 | 1.447E-15 | THYN1     | -0.596764 | 9.478E-15 |
| C11orf31 | -0.614543 | 3.928E-16 | LOC729156 | -1.61588  | 1.669E-15 | C6orf125  | -0.685872 | 9.879E-15 |
| LYRM4    | -0.684922 | 3.937E-16 | UQCR10    | -0.724527 | 1.677E-15 | UXT       | -0.754921 | 9.911E-15 |
| MED11    | -0.600241 | 4.228E-16 | NAGK      | -0.580029 | 1.981E-15 | U2AF1     | -0.615337 | 1.009E-14 |
| COX7C    | -0.742216 | 4.285E-16 | C6orf1    | -0.825928 | 1.997E-15 | DPM2      | -0.663074 | 1.019E-14 |
| SAT2     | -0.744773 | 4.297E-16 | SDR39U1   | -0.615213 | 1.996E-15 | C22orf27  | -0.835652 | 1.044E-14 |
| LGALS1   | -1.273643 | 4.421E-16 | CCDC56    | -0.738521 | 2.024E-15 | NDUFS7    | -0.712019 | 1.045E-14 |
| ASAP1IT1 | -1.041728 | 4.818E-16 | MRPL23    | -0.741654 | 2.048E-15 | DULLARD   | -0.432913 | 1.044E-14 |
| DPY30    | -0.678468 | 4.975E-16 | ZSWIM7    | -0.594453 | 2.092E-15 | CCDC73    | -1.065436 | 1.043E-14 |
| NDUFC2   | -0.765671 | 5.184E-16 | COX6A1    | -0.746175 | 2.1E-15   | RPL36AL   | -0.658446 | 1.056E-14 |
| STX8     | -0.661453 | 5.184E-16 | MPV17L2   | -0.596356 | 2.144E-15 | DGCR6L    | -0.691716 | 1.091E-14 |
| CDC34    | -0.664344 | 5.289E-16 | TSSC4     | -0.579488 | 2.289E-15 | FAM100A   | -0.641049 | 1.122E-14 |
| TCEB2    | -0.749664 | 5.509E-16 | RPL41     | -0.806207 | 2.304E-15 | DBNDD2    | -0.660338 | 1.143E-14 |
| FAM128A  | -0.828607 | 5.803E-16 | MRPL54    | -0.659311 | 2.442E-15 | C15orf63  | -0.825187 | 1.219E-14 |
| THAP8    | -0.833802 | 5.813E-16 | RABAC1    | -0.772145 | 2.549E-15 | RPS29     | -0.802615 | 1.246E-14 |
| EMD      | -0.618501 | 5.888E-16 | LOC152217 | -0.643605 | 2.939E-15 | SCNM1     | -0.628272 | 1.262E-14 |
| IGFBP6   | -1.459351 | 6.49E-16  | NEDD8     | -0.549593 | 3.045E-15 | TOMM6     | -0.685926 | 1.27E-14  |
| RPS27    | -1.419436 | 6.839E-16 | RRAS      | -1.071455 | 3.111E-15 | ELOF1     | -0.623908 | 1.295E-14 |
| PCGF1    | -0.600092 | 7.962E-16 | RPL15     | -0.575899 | 3.135E-15 | ZNF524    | -0.750375 | 1.31E-14  |
| CD99     | -0.943332 | 8.064E-16 | SOX18     | -1.090731 | 3.273E-15 | RPL23AP32 | -1.147108 | 1.329E-14 |
| GTF2H5   | -0.721092 | 8.263E-16 | LDLRAD2   | -0.993612 | 3.363E-15 | SNAPC2    | -0.699848 | 1.414E-14 |
| MTCP1NB  | -0.735131 | 8.557E-16 | FAM127B   | -1.243311 | 3.359E-15 | H2AFJ     | -1.020479 | 1.482E-14 |
| TRMT61A  | -0.775953 | 8.606E-16 | AIP       | -0.61032  | 3.448E-15 | C9orf119  | -0.700287 | 1.727E-14 |
| CWC15    | -0.584699 | 8.779E-16 | PTOV1     | -0.646399 | 3.676E-15 | RPL18     | -0.740778 | 1.862E-14 |
| CCDC130  | -0.52035  | 9.172E-16 | DNAJC4    | -0.71586  | 3.727E-15 | MRPL28    | -0.621387 | 1.87E-14  |
| C11orf51 | -0.663918 | 9.332E-16 | LSM7      | -0.741708 | 3.728E-15 | EGFL7     | -1.152405 | 2.024E-14 |

|           |           |           |           |           |           |          |           |           |
|-----------|-----------|-----------|-----------|-----------|-----------|----------|-----------|-----------|
| NPF       | -1.064734 | 2.131E-14 | ERCC1     | -0.553163 | 6.02E-14  | TXN2     | -0.534702 | 1.816E-13 |
| LAGE3     | -0.695465 | 2.234E-14 | PSMC1     | -0.564404 | 6.138E-14 | C1orf151 | -0.63608  | 1.832E-13 |
| WASH3P    | -0.732059 | 2.356E-14 | ITGB1BP1  | -0.455395 | 6.4E-14   | ZNF771   | -0.707026 | 1.874E-13 |
| NDUFB2    | -0.58904  | 2.444E-14 | TMEM219   | -0.513316 | 6.721E-14 | ABHD14A  | -0.752424 | 1.979E-13 |
| ROBLD3    | -0.549072 | 2.629E-14 | NRM       | -0.719984 | 6.998E-14 | SERF1A   | -0.594961 | 2.017E-13 |
| SRM       | -0.702669 | 2.83E-14  | COMMD9    | -0.508253 | 7.079E-14 | PIN1     | -0.545694 | 2.037E-13 |
| C14orf179 | -0.512776 | 2.839E-14 | ATPIF1    | -0.663781 | 7.465E-14 | HINT2    | -0.668783 | 2.116E-13 |
| SNORA48   | -1.321843 | 2.878E-14 | NXT1      | -0.582922 | 7.522E-14 | PDLIM4   | -1.346097 | 2.262E-13 |
| PLAC9     | -1.661964 | 2.9E-14   | LSM10     | -0.497724 | 7.943E-14 | PPIG     | -0.644372 | 2.273E-13 |
| MRPL21    | -0.741719 | 2.926E-14 | ROM1      | -0.873534 | 7.948E-14 | MRPL51   | -0.576805 | 2.501E-13 |
| C11orf74  | -0.885492 | 2.967E-14 | LOC643719 | -1.210979 | 8.388E-14 | ALKBH6   | -0.619697 | 2.589E-13 |
| MLF2      | -0.545584 | 3.019E-14 | MRPL34    | -0.616203 | 8.411E-14 | C3orf54  | -1.000266 | 2.646E-13 |
| GUK1      | -0.580087 | 3.033E-14 | NDUFS3    | -0.515897 | 8.424E-14 | FAM108A1 | -0.637581 | 2.854E-13 |
| RPL31     | -0.70642  | 3.112E-14 | RPL27     | -0.724016 | 9.571E-14 | TRAPPC3  | -0.43205  | 2.853E-13 |
| INO80E    | -0.601484 | 3.271E-14 | COX4I1    | -0.622704 | 9.598E-14 | FHL3     | -0.899738 | 2.852E-13 |
| RBPMS     | -1.214257 | 3.31E-14  | C1orf35   | -0.675394 | 9.963E-14 | C6orf226 | -0.796287 | 2.885E-13 |
| TMEM223   | -0.638362 | 3.338E-14 | PIIB      | -0.627025 | 1.011E-13 | OAZ1     | -0.553429 | 3.189E-13 |
| HSP90AB4P | -1.276955 | 3.502E-14 | GPX4      | -0.784608 | 1.106E-13 | JMJD8    | -0.519245 | 3.205E-13 |
| SYNC      | -2.00827  | 3.59E-14  | RPS24     | -0.702638 | 1.145E-13 | SSU72    | -0.44392  | 3.23E-13  |
| TCEAL4    | -0.946945 | 3.609E-14 | CHCHD5    | -0.685735 | 1.201E-13 | C12orf57 | -0.85973  | 3.414E-13 |
| SSSCA1    | -0.625936 | 3.944E-14 | NACA      | -0.599941 | 1.224E-13 | TRPT1    | -0.550327 | 3.423E-13 |
| NUDT14    | -0.840483 | 4.208E-14 | GLRX5     | -0.601693 | 1.302E-13 | CHST12   | -0.668951 | 3.462E-13 |
| POLE4     | -0.777476 | 4.273E-14 | RAB2B     | -0.504261 | 1.306E-13 | DNAJC8   | -0.432602 | 3.577E-13 |
| RPL23     | -0.68619  | 4.558E-14 | TUBG2     | -0.875626 | 1.314E-13 | CHMP4B   | -0.539881 | 3.923E-13 |
| MRPL41    | -0.778575 | 4.575E-14 | SAP18     | -0.502209 | 1.422E-13 | NPIPL3   | -1.062661 | 3.95E-13  |
| NDUFB10   | -0.585965 | 4.616E-14 | COX7B     | -0.744506 | 1.497E-13 | RAB24    | -0.579167 | 4.143E-13 |
| LOC729991 | -0.420698 | 4.643E-14 | SNX22     | -0.715059 | 1.583E-13 | BUD31    | -0.644205 | 4.223E-13 |
| TIMM8B    | -0.677043 | 4.635E-14 | NME3      | -0.736895 | 1.585E-13 | C19orf73 | -0.845633 | 4.331E-13 |
| CAPZB     | -0.476114 | 5.069E-14 | MANBAL    | -0.545264 | 1.6E-13   | PTBP2    | -0.845962 | 4.53E-13  |
| SNRPB2    | -0.807863 | 5.083E-14 | SF3A2     | -0.713732 | 1.599E-13 | DOHH     | -0.709744 | 5.082E-13 |
| APRT      | -0.767069 | 5.106E-14 | SF3B5     | -0.540597 | 1.601E-13 | METAP2   | -0.488338 | 5.139E-13 |
| PEF1      | -0.406459 | 5.383E-14 | AES       | -0.607337 | 1.604E-13 | C19orf20 | -0.836004 | 5.329E-13 |
| DEXI      | -0.547532 | 5.906E-14 | SNRPD2    | -0.607043 | 1.679E-13 |          |           |           |

**Appendix Table S4.** The metabolic profiling of SGC7901 cells treated with NC (negative control) or sh-*UHMK1*, or reintroduce ATF4 while knocking down *UHMK1*.

|                             | NC                  | NC                  | NC                 | sh <i>UHMK1</i><br>-#1 | sh <i>UHMK1</i><br>-#1 | sh <i>UHMK1</i><br>-#1 | sh <i>UHMK1</i> -#1<br>+<br>ov-ATF4 | sh <i>UHMK1</i> -#<br>1+<br>ov-ATF4 | sh <i>UHMK1</i> -#<br>1+<br>ov-ATF4 |
|-----------------------------|---------------------|---------------------|--------------------|------------------------|------------------------|------------------------|-------------------------------------|-------------------------------------|-------------------------------------|
| PRPP                        | 1159.84             | 1485.46             | 1185.6             | 621.45                 | 554.58                 | 489.85                 | 2156.8                              | 1920.36                             | 1745.81                             |
| IMP                         | 3125.65             | 3358.74             | 3096.1             | 1568.91                | 2130.21                | 1423.8                 | 2984.56                             | 2781.59                             | 3005.84                             |
| inosine                     | 1984.6              | 2156.8              | 2251.41            | 1152.36                | 1589.45                | 1741.23                | 2236.51                             | 1956.58                             | 2064.25                             |
| hypoxanthine                | 6123.21             | 5684.98             | 5894.78            | 4123.85                | 4592.36                | 4325.15                | 5623.89                             | 5541.56                             | 5398.66                             |
| xanthine                    | 5124.3              | 4769.99             | 5023.65            | 3369.89                | 3001.58                | 3695.89                | 4858.12                             | 4456.84                             | 4560.98                             |
| xanthosine                  | 4489.5              | 4005.65             | 4213.51            | 3126.55                | 2810.56                | 2798.56                | 3985.65                             | 3884.52                             | 4001.56                             |
| AMP                         | 9077.55             | 9470.67             | 8671.08            | 6797.73                | 6469.05                | 7250.52                | 8395.74                             | 8683.68                             | 9037.74                             |
| adenine                     | 4156.8              | 4002.51             | 3852.13            | 2213.04                | 2841.23                | 2456.12                | 4415.65                             | 4123.06                             | 4215.98                             |
| adenosine                   | 2184.2              | 2356.14             | 2258.45            | 1568.94                | 1452.13                | 1389.54                | 2005.64                             | 2152.32                             | 2265.84                             |
| GMP                         | 1457.28             | 1628.44             | 1577.81            | 576.16                 | 493.115                | 672.945                | 1342.73                             | 1392.06                             | 1528.115                            |
| guanine                     | 3365.8              | 3120.56             | 3285.56            | 3036.51                | 2856.21                | 2301.75                | 3085.69                             | 3451.21                             | 3285.69                             |
| guanosine                   | 2214.5              | 2105.65             | 2385.78            | 1125.36                | 1256.74                | 1002.36                | 1986.85                             | 2007.45                             | 2130.54                             |
| PHP                         | 5678.91             | 5786.35             | 5468.21            | 4123.15                | 3641.25                | 3896.32                | 4989.56                             | 5436.99                             | 5145.98                             |
| P-ser<br>serine             | 3456.28<br>11856.23 | 3366.85<br>10258.96 | 3789.56<br>9856.89 | 2926.66<br>12003.64    | 3211.41<br>9911.56     | 3369.56<br>10423.85    | 3562.31<br>11884.21                 | 3489.21<br>10236.85                 | 3341.22<br>10089.5                  |
| G1P                         | 4156.89             | 3987.66             | 4312.3             | 4412.36                | 4122.58                | 4215.69                | 3906.88                             | 4268.51                             | 4107.25                             |
| G6P                         | 6897.56             | 7542.3              | 7166.8             | 7166.23                | 6945.31                | 6823.77                | 7025.68                             | 7356.75                             | 7245.89                             |
| F6P                         | 3156.8              | 3066.5              | 3323.55            | 2986.58                | 3268.52                | 3125.78                | 3341.55                             | 3120.56                             | 3004.89                             |
| F1,6P                       | 4156.3              | 4065.7              | 4321.88            | 4082.65                | 4120.36                | 4256.13                | 4320.14                             | 3965.87                             | 4128.98                             |
| DHAP                        | 2189.74             | 2068.99             | 2341.54            | 2256.4                 | 2013.8                 | 1985.66                | 2235.4                              | 2356.14                             | 2100.56                             |
| 2,3BPG                      | 1153.69             | 995.5               | 1289.58            | 1187.66                | 895.69                 | 1123.58                | 1389.56                             | 1203.5                              | 1005.46                             |
| 3PG                         | 5612.3              | 5513.46             | 5823.45            | 6041.23                | 6120.8                 | 5841.9                 | 6123.89                             | 5741.23                             | 6089.12                             |
| 2PG                         | 2891.5              | 3001.2              | 2744.8             | 3211.56                | 2987.45                | 3004.25                | 2689.74                             | 2985.46                             | 2741.68                             |
| PEP                         | 4015.6              | 3897.41             | 4152.36            | 3685.45                | 3845.21                | 4001.23                | 4123.5                              | 4006.89                             | 3964.58                             |
| Pyruvate                    | 11569.23            | 10054.85            | 13895.41           | 13426.57               | 9687.98                | 11568.42               | 12568.98                            | 15462.3                             | 13456.21                            |
| 6-phosphogluconate          | 1023.56             | 956.23              | 1156.21            | 982.56                 | 1200.3                 | 1009.85                | 1156.41                             | 1023.86                             | 1006.24                             |
| Ribulose 5P                 | 732.89              | 885.6               | 945.21             | 912.3                  | 745.6                  | 812.3                  | 689.5                               | 758.9                               | 845.9                               |
| Ribose 5P                   | 1556.89             | 1325.89             | 1645.23            | 1289.99                | 1489.56                | 1541.23                | 1326.56                             | 1203.65                             | 1185.21                             |
| Sedoheptulose 7P            | 1385.96             | 1200.56             | 1156.41            | 1523.45                | 1320.5                 | 1286.59                | 1198.9                              | 1250.4                              | 1352.3                              |
| erythrose 4P                | 986.56              | 756.8               | 854.1              | 659.8                  | 885.69                 | 741.56                 | 841.25                              | 947.65                              | 723.4                               |
| xylulose 5P                 | 2156.36             | 2310.23             | 1956.24            | 1856.99                | 2355.61                | 2005.85                | 2251.23                             | 2185.69                             | 1952.31                             |
| N-carbamoyl-L-asp<br>artate | 1082.13             | 1236.33             | 1158.47            | 761.64                 | 652.79                 | 719.55                 |                                     |                                     |                                     |
| UMP                         | 1952.28             | 1898.53             | 2031.42            | 1471.15                | 1399.16                | 1342.95                |                                     |                                     |                                     |

**Appendix Table S5.** Peptides identified by MS of UHMK1 interacting proteins

| NCOA3                       | PEPSc<br>ore | qvalue | ABL1                         | PEPSc<br>ore | qvalue |
|-----------------------------|--------------|--------|------------------------------|--------------|--------|
| K.MSQCTSSTIPSSSQEK.D        | 6.989        | 0      | K.EIKHPNLVQLLGVCTR.E         | 6.384        | 0      |
| R.NVTVTQTPSSGDWGLPN<br>SK.A | 6.801        | 0      | R.QVTVAPASGLPHKEEAG<br>K.G   | 6.251        | 0      |
| R.AVSLDSPVSVGSSPPVK.<br>N   | 6.345        | 0      | R.DISNGALAFPLDTADPA<br>K.S   | 6.08         | 0      |
| K.TPHDILEDINASPEMR.Q        | 6.208        | 0      | R.LKPAPPPPAASAGK.A           | 6.06         | 0      |
| R.FFSLNDGQSWSQK.R           | 6.132        | 0      | K.HKLGQGQYGEVYEGVW<br>K.K    | 5.925        | 0      |
| K.ESSVEGAENQRGPESK.<br>G    | 5.973        | 0      | K.LGGGQYGEVYEGVWKK<br>.Y     | 5.446        | 0      |
| M.SGLGENLDPLASDSR.K         | 5.93         | 0      | L.MTGDTYTAHAGAK.F            | 5.403        | 0      |
| K.LPCDTPGQGLTCSGEK.R        | 5.908        | 0      | R.HGGPHCNVFEHEALQR<br>.P     | 5.399        | 0      |
| R.HGFVSTHFLQR.E             | 5.534        | 0      | R.LMTGDTYTAHAGAK.F           | 5.249        | 0      |
| R.AYGLADPSTTGQMSG<br>R.Y    | 5.406        | 0      | K.HSWYHGPVSR.N               | 4.901        | 0      |
| K.RKLPCDTPGQGLTCSGE<br>K.R  | 5.393        | 0      | K.ERGPPEGGLNEDER.L           | 4.864        | 0      |
| K.LLQLLTCSSDDR.G            | 4.837        | 0      | R.PVASDFEPQGLSEAAAR.W        | 4.819        | 0      |
| K.LDNSPNMNITQPSK.V          | 4.783        | 0      | R.INTASDGKLYVSSESR.F         | 4.682        | 0      |
| K.LLQNGNSPAEVAK.I           | 4.536        | 0      | K.ATSLVDAVNSDAAK.P           | 4.585        | 0      |
| K.STVNGVSWTNETQR.Q          | 4.332        | 0      | R.SCSASCVPHGAKDTEWR<br>.S    | 4.312        | 0      |
| M.SGLGENLDPLASDSR.<br>R     | 4.179        | 0      | L.YDFVASGDNTLSITKGE<br>K.L   | 4.208        | 0      |
| R.ALGIPELVNQGQALEPK.<br>Q   | 3.932        | 0      | K.KPVLPAATPK.P               | 4.079        | 0      |
| R.KLPCDTPGQGLTCSGEK<br>R.R  | 3.712        | 0      | K.HPNLVQLLGVCTR.E            | 3.919        | 0      |
| K.QDAFQGEAAVMMDQ<br>K.A     | 3.604        | 0      | W.CEAQTKNGQGW.V              | 3.771        | 0      |
| R.FSLADGTIVTAQTK.S          | 3.417        | 0      | K.NLYTFCVSYVDSIQQMR.<br>N    | 3.721        | 0      |
| R.ILHKLLQNGNSPAEVAK.<br>I   | 3.277        | 0      | R.GAVSTLLQAPLPTK.T           | 3.55         | 0      |
| K.DSLGPLLQALDGFLFV<br>VNR.D | 3.121        | 0      | E.ALQRPVASDFEPQGLSE<br>AAR.W | 3.494        | 0      |
| K.LFRNPVTNDR.H              | 3.085        | 0      | R.LATGEEEGGSSSK.R            | 3.424        | 0      |
| A.GRMEPMNSNSM.G             | 3.072        | 0      | K.FPIKWTAPESLAYNK.F          | 3.325        | 0      |

|                              |       |       |                              |       |       |
|------------------------------|-------|-------|------------------------------|-------|-------|
| R.NPVTNDR.H                  | 3.022 | 0     | K.NGQGWVPSNYITPVNSL<br>EK.H  | 3.295 | 0     |
| R.KLPCDTPGQGLTCSGEEK.<br>R   | 2.861 | 0     | R.NAAEYLLSSGINGSFLVR<br>.E   | 3.214 | 0     |
| R.HDLSGKVVNIDTNSLR.S         | 2.734 | 0     | K.AGSGAPGGTSK.G              | 3.139 | 0     |
| G.SPKIASHQF.S                | 2.732 | 0     | K.KNEEAADDEVFK.D             | 3.135 | 0     |
| K.QQVFQGTNSLGLK.S            | 2.719 | 0     | R.EAINKLENNLR.E              | 3.113 | 0     |
| R.NSSFSQQQFAH.Q              | 2.628 | 0     | K.TLKEDTMEVEEFLK.E           | 3.015 | 0     |
| K.ELQPQVEGVDNK.M             | 2.555 | 0     | K.LGGGQYGEVYEGVWK.<br>K      | 2.962 | 0     |
| R.TFPSNPESFITR.H             | 2.544 | 0     | K.DIMESSPGSSPPNLTpk.P        | 2.852 | 0     |
| K.DTSSITSCGDGNVVK.Q          | 2.529 | 0     | K.SSTLTSSR.L                 | 2.829 | 0     |
| R.DGNIVFVSENVVTQYLQY<br>K.Q  | 2.514 | 0     | R.DTTDVPEMPHsk.G             | 2.813 | 0     |
| R.SRELLSHHFR.Q               | 2.5   | 0     | R.QFDSSTFGGHK.S              | 2.663 | 0     |
| R.YLLDRDDPSDALSK.E           | 2.39  | 0     | K.LRVLGYNHNGEWCEAQ<br>TK.N   | 2.61  | 0.001 |
| G.MPMGPDQKY.C                | 2.336 | 0     | K.RNKPTVYGVSPNYDK.W          | 2.521 | 0.001 |
| R.FFSLNDGQSWSQKR.H           | 2.327 | 0.002 | M.TGDTYTAHAGAK.F             | 2.442 | 0.001 |
| H.TLLSNTDATGLEEIDR.A         | 2.323 | 0.002 | P.ASGLPHKEEAGK.G             | 2.428 | 0.001 |
| K.ADVSSTGQGVIDK.D            | 2.322 | 0.002 | R.VLGYNHNGEWCEAQTK.<br>N     | 2.328 | 0.001 |
| K.TISNDDDVQK.A               | 2.315 | 0.002 | R.KERGPPEGGLNEDER.L          | 2.327 | 0.001 |
| R.GHSSLTNSPLDSSCK.E          | 2.312 | 0.002 | H.KLGGGQYGEVYEGVWK<br>.K     | 2.27  | 0.001 |
| K.TPHDILEDINASPEMRQR<br>.Y   | 2.191 | 0.002 | R.NKPTVYGVSPNYDK.W           | 2.263 | 0.002 |
| R.VSSPPNAMMSSR.M             | 2.116 | 0.002 | R.LATGEEEGGSSSKR.F           | 2.207 | 0.002 |
| R.QRYETMQCFALSQPR.A          | 2.075 | 0.002 | K.GQGESDPLDHEPAVSPL<br>LPR.K | 2.158 | 0.002 |
| H.SPMASSGNTGNHSF.S           | 2.069 | 0.002 | K.PSNGAGVPNGALR.E            | 2.14  | 0.002 |
| K.RHYQEAYLNGHAETPV<br>YR.F   | 2.037 | 0.002 | S.SVKEISDIVQR.]              | 2.017 | 0.002 |
| R.YETMQCFALSQPR.A            | 2.016 | 0.002 | R.GPPEGGLNEDER.L             | 2.011 | 0.002 |
| R.NSLDDLVGPPSNLEGQS<br>DER.A | 2.016 | 0.002 | R.RPSLPALHFIK.G              | 1.968 | 0.002 |
| N.YGMGQQPDPAFGR.V            | 2.007 | 0.002 | C.WQWNPSDRPSF.A              | 1.919 | 0.002 |
| K.QEDLVNTSVYNILHEED<br>RK.D  | 2.007 | 0.004 | K.TLKEDTMEVEEFLKEAA<br>VMK.E | 1.887 | 0.002 |
| P.HDILEDINASPEMR.Q           | 2.005 | 0.004 | R.QVTVAPASGLPHK.E            | 1.839 | 0.002 |
| V.SNQDSKSPLGFYCDQNP<br>VES.S | 1.997 | 0.004 | R.MERPEGCPEKVYELMR.<br>A     | 1.763 | 0.002 |
| K.ESSVEGAENQR.G              | 1.982 | 0.004 | K.EDTMEVEEFLK.E              | 1.715 | 0.006 |

|                               |       |       |                                 |       |       |
|-------------------------------|-------|-------|---------------------------------|-------|-------|
| K.VVNIDTNSLR.S                | 1.956 | 0.004 | K.GSALGTPAAAEPVTPTS<br>K.A      | 1.693 | 0.006 |
| R.LQGQQFLNQSR.Q               | 1.954 | 0.004 | R.EPPFYIITEFMTYGNLLD<br>YLR.E   | 1.651 | 0.006 |
| K.ITAEATGK.D                  | 1.944 | 0.004 | R.SCSASCVPHGAK.D                | 1.64  | 0.006 |
| K.QEDLVNTSVYNILHEED<br>R.K    | 1.936 | 0.004 | K.ATSLVDAVNSDAAKPSQ<br>PGEGLK.K | 1.523 |       |
| R.SSMRPGFEDIIR.R              | 1.887 | 0.004 |                                 |       |       |
| A.ISEGVGTSLSTLSSPGP<br>K.L    | 1.851 | 0.004 |                                 |       |       |
| K.TPHDILEDINASPEM.R           | 1.844 | 0.004 |                                 |       |       |
| R.AMMEEGEDLQSCMICV<br>AR.R    | 1.832 | 0.004 |                                 |       |       |
| R.HYQEAYLNGHAETPVY<br>R.F     | 1.812 | 0.004 |                                 |       |       |
| R.MMDSQENYGSSMGGPN<br>R.N     | 1.799 | 0.004 |                                 |       |       |
| V.NQQQALEPKQDAFQQQ<br>EA.A    | 1.773 | 0.004 |                                 |       |       |
| K.SPLGFYCDQNPVSSMC<br>QSNSR.D | 1.764 | 0.004 |                                 |       |       |

| SRSF1                           | PEPSc<br>ore | qvalue | TMSB4X                            | PEPSc<br>ore | qvalue |
|---------------------------------|--------------|--------|-----------------------------------|--------------|--------|
| R.GGPPFAFVEFEDPR.D              | 7.6          | 0      | T.QEKNPLPSKETLE                   | 7.112        | 0      |
| D.PRDAEDAVYGR.D                 | 6.136        | 0      | M.SDKPDMAEIEKFDK.S                | 6.957        | 0      |
| R.SGRGTGRGGGGGGGGGAP<br>RGRY.G  | 5.997        | 0      | K.PDMAEIEKFDKSK.L                 | 6.258        | 0      |
| R.GGPPFAFVEFEDPRDAEDA<br>VYGR.D | 5.708        | 0      | K.PDMAEIEKFDK.S                   | 5.736        | 0      |
| K.FRSHEGETAYIRVK.V              | 5.395        | 0      | K.NPLPSKETIEQEK.Q                 | 5.521        | 0      |
| M.SGGGVIRGPAGNDCR.I             | 5.222        | 0      | P.SKETIEQEKQAGES.]                | 5.389        | 0      |
| R.SHEGETAYIRVK.V                | 4.793        | 0      | D.KPDMAEIEKFDKSKLK<br>KTET.Q      | 5.186        | 0      |
| S.HEGETAYIR.V                   | 4.678        | 0      | M.SDKPDMAEIEKFDKS.K               | 5.186        | 0      |
| K.DHMREAGDVCYADVYR.D            | 4.592        | 0      | E.KNPLPSKETIEQEK.Q                | 4.532        | 0      |
| L.KDHMREAGDVCY.A                | 4.511        | 0      | D.MAEIEKFDKSKLKK.T                | 4.457        | 0      |
| A.EDAVYGRDGYDYDGYR.L            | 4.486        | 0      | D.KPDMAEIEKFDK.S                  | 4.437        | 0      |
| N.RVVVSGLPPSGSWQDLK.D           | 4.35         | 0      | D.KPDMAEIEKFDKSK.L                | 4.426        | 0      |
| R.TKDIEDVFYKY.G                 | 4.295        | 0      | D.KPDMAEIEKFDKSKLK<br>KTETQEK.N.P | 4.424        | 0      |
| R.TKDIEDVFYKYGAIR.D             | 4.148        | 0      | D.KPDMAEIEKFDKSKLK<br>KTETQ.E     | 3.963        | 0      |

|                                    |       |       |                                  |       |       |
|------------------------------------|-------|-------|----------------------------------|-------|-------|
| V.SGLPPSGSWQDLKDHMR.E              | 4.019 | 0     | M.SDKPDMAEIEKFD.K                | 3.856 | 0     |
| M.SGGGVIRGPAGNDCRI.Y               | 3.987 | 0     | L.PSKETIEQEKQAGES.]              | 3.843 | 0     |
| R.DAEDAVYGRDGYDYDGY<br>R.L         | 3.894 | 0     | M.SDKPDMAEIEKFDKSK<br>L.K.K      | 3.552 | 0     |
| R.IYVGNLPPDIR.T                    | 3.876 | 0     | K.KTETQEKNPLPSKETIE<br>QEK.Q     | 3.091 | 0     |
| R.RGGPPFAFVEFEDPRDAED<br>AVYG.R    | 3.5   | 0     | M.SDKPDMAEIEKFDKSK<br>LKK.T      | 3.019 | 0     |
| R.GGPPFAFVEFEDPRD.A                | 3.419 | 0     | D.MAEIEKFDKSKLKKTE.<br>T         | 2.878 | 0     |
| R.EAGDVCYADVYRDGTGV<br>VEF.V       | 3.33  | 0     | P.SKETIEQEK.Q                    | 2.824 | 0     |
| R.RSEN RVVVSGLPPSGSWQD<br>LKDHMR.E | 3.18  | 0     | K.TETQEKNPLPSKETIEQ<br>EK.Q      | 2.822 | 0     |
| G.PPFAFVEFEDPRDAEDAVY<br>GR.D      | 3.016 | 0     | T.ETQEKNPLPSKETIEQE<br>K.Q       | 2.798 | 0     |
| R.GGPPFAFVEFEDPRDAEDA<br>VY.G      | 2.958 | 0     | S.KETIEQEKQAGES.]                | 2.632 | 0     |
| R.RGGPPFAFVEFEDPRD.A               | 2.953 | 0     | D.MAEIEKFDKSKL.K                 | 2.426 | 0     |
| F.RSHEGETAYIR.V                    | 2.909 | 0     | M.SDKPDMAEIEKFDKSK<br>LKKT.E     | 2.392 | 0.002 |
| R.EAGDVCYADVYRDGTGV<br>VEFVR.K     | 2.828 | 0     | K.TETQEKNPLPSKETIEQ<br>EKQA.G    | 2.294 | 0.002 |
| R.EAGDVCYADVYR.D                   | 2.457 | 0.002 | K.NPLPSKETIEQEKQ.A               | 2.185 | 0.002 |
| F.AFVEFEDPRDAEDAVY.G               | 2.455 | 0.002 | M.SDKPDMAEIEKFDKSK<br>LKKTETQE.K | 2.156 | 0.002 |
| T.KDIEDVFIK.Y                      | 2.412 | 0.002 | D.KPDMAEIEKFDKSKL<br>KTE.T       | 2.022 | 0.002 |
| R.GGPPFAFVEFEDPRDAED.A             | 2.201 | 0.002 | A.EIEKFDKSKLKKTE.T               | 1.937 | 0.002 |
| F.AFVEFEDPRDAEDAVYGR.<br>D         | 2.199 | 0.002 | E.TQEKNPLPSKETIEQEK.<br>Q        | 1.966 | 0.002 |
| A.GDVCYADVYR.D                     | 2.174 | 0.002 | E.TQEKNPLPSKETIEQEK<br>Q.A       | 1.944 | 0.002 |
| R.RSEN RVVVSGLPPSGSWQD<br>LK.D     | 2.135 | 0.002 | D.KPDMAEIEKFDKSKL.<br>K          | 1.796 | 0.002 |
| E.AGDVCYADVYRDGTGVVE<br>FVR.K      | 2.135 | 0.002 | M.SDKPDMAEIEK.F                  | 1.775 | 0.002 |
| R.SHEGETAYIR.V                     | 2.113 | 0.002 | M.SDKPDMAEIEKF.D                 | 1.767 | 0.002 |
| K.YGAIRDIDLKNR.R                   | 2.108 | 0.002 | N.PLPSKETIEQEK.Q                 | 1.703 | 0.002 |
| N.RVVVSGLPPSGSW.Q                  | 2.088 | 0.002 | P.LPSKETIEQEK.Q                  | 1.607 | 0.002 |
| R.RGGPPFAFVEFEDPR.D                | 2.086 | 0.002 | D.KPDMAEIEKFDKSKL<br>K.T         | 1.599 | 0.006 |
| N.RVVVSGLPPSGSWQDL.K               | 2.055 | 0.002 | M.SDKPDMAEIEKFDKSK               | 1.504 | 0.006 |



|                                |       |       |                                 |       |       |
|--------------------------------|-------|-------|---------------------------------|-------|-------|
|                                |       |       | LKKTET.Q                        |       |       |
| R.DGTGVVEFVRK.E                | 2.041 | 0.002 | K.TETQEKNPLPSK.E                | 1.384 | 0.006 |
| L.PPSGSWQDLKDHMR.E             | 1.634 | 0.004 | M.SDKPDMAEIEKFDKSK<br>LKKTETQ.E | 1.376 | 0.006 |
| E.DMTYAVRKLD.N                 | 1.619 | 0.004 | M.SDKPDMAEIEKFDKSK<br>L.K       | 1.374 | 0.006 |
| Y.VGNLPPDIRTKDIEDVIFY.K        | 1.6   | 0.004 | T.QEKNPLPSKETIEQEKQ<br>AGES.]   | 1.279 | 0.008 |
| I.RGPAGNNDCCR.I                | 1.593 | 0.004 | [.MSDKPDMAEIEKFDKSK<br>.L       | 1.27  | 0.008 |
| R.GGGGGGGGAPRGR.Y              | 1.576 | 0.004 | D.MAEIEKFDKSKLKKTE<br>T.Q       | 1.267 | 0.008 |
| P.PSGSWQDLKDHMR.E              | 1.553 | 0.004 | K.KTETQEKNPLPSKETI.E            | 1.254 | 0.008 |
| Y.AVRKLDNTKF.R                 | 1.525 | 0.004 | T.QEKNPLPSKETIEQEK.Q            | 1.204 | 0.008 |
| F.VEFEDPRDAEDAVYGR.D           | 1.486 | 0.004 | K.LKKTETQEKNPLPSKET<br>IEQEK.Q  | 1.133 | 0.008 |
| I.YVGNLPPDIR.T                 | 1.485 | 0.004 |                                 |       |       |
| R.GPAGNNDCCR.I                 | 1.443 | 0.004 |                                 |       |       |
| R.DGYDYDGYR.L                  | 1.404 | 0.004 |                                 |       |       |
| G.SWQDLKDHMR.E                 | 1.396 | 0.006 |                                 |       |       |
| A.DVYRDGTGVVEFV.R              | 1.391 | 0.006 |                                 |       |       |
| R.RGGPPFAFVEFEDPRDAED<br>AVY.G | 1.385 | 0.006 |                                 |       |       |

| HUWE1                          | PEPSc<br>ore | qvalue | FBXO6                            | PEPSc<br>ore | qvalue |
|--------------------------------|--------------|--------|----------------------------------|--------------|--------|
| R.SAATSGAGSTTSGVVSGS<br>LGSR.E | 7.202        | 0      | R.NQASSEAQPGQK.H                 | 7.26         | 0      |
| R.AGSSTPGDAPPAVAEVQ<br>GR.S    | 6.876        | 0      | K.HGQEEAAQSPYRA.V                | 7.141        | 0      |
| R.RQQAATSESSQSEASV<br>R        | 6.707        | 0      | K.HGQEEAAQSPYR.A                 | 7.113        | 0      |
| R.RQQAATSESSQSEASV<br>R.R      | 6.581        | 0      | K.DWDQPVADWK.I                   | 7.102        | 0      |
| R.SSDPLGDTASNLGSAVD<br>ELMR.H  | 6.49         | 0      | R.ADCGCTYQLK.V                   | 6.815        | 0      |
| R.LGSSGLGSASSIQA<br>AVR.Q      | 6.215        | 0      | R.NQASSEAQPGQKHGQE<br>EAAQSPYR.A | 6.803        | 0      |
| R.SSDPLGDTASNLGSAVD<br>ELMR.H  | 5.74         | 0      | R.DTQYWAGWYGPR.V                 | 6.757        | 0      |
| R.LLGPAAADILQLSSSLPL<br>QSR.G  | 5.161        | 0      | D.LIDLMTLWK.R                    | 6.73         | 0      |
| R.SHHAASSTTAPT<br>PAAR.S       | 4.72         | 0      | K.HGQEEAAQSPYRAVVQ               | 6.677        | 0      |

|                                    |       |       |                                    |       |       |
|------------------------------------|-------|-------|------------------------------------|-------|-------|
|                                    |       |       | IF.]                               |       |       |
| R.HADHSSLTLGSGSSTR.<br>L           | 4.702 | 0     | I.LLELFTHVPAR.Q                    | 6.217 | 0     |
| R.AQC)ETLSPDGLPEEQPQ<br>TTK.L      | 4.617 | 0     | K.VESLPGAHGTFDPDK.<br>V            | 6.163 | 0     |
| R.DLSMSEEDQMMR.A                   | 4.202 | 0     | R.VTNSSIVVSPK.M                    | 6.096 | 0     |
| R.LLVGNDDVHIAR.S                   | 3.924 | 0     | K.MTRNQASSEAQPGQK.<br>H            | 5.888 | 0     |
| K.VSDGGSSTDFK.M                    | 3.777 | 0     | T.RNQASSEAQPGQKHGQ<br>EEAAQSPYRA.V | 5.853 | 0     |
| K.KTPTEAPADCR.A                    | 3.744 | 0     | R.YILFQHGGGR.D                     | 5.847 | 0     |
| R.SDGSGESAQPPEDSSPPA<br>SSESSSTR.D | 3.692 | 0     | K.SQLVDLVAEGYWEELL<br>DTFRPDIVVK.D | 4.006 | 0     |
| K.VPLQGFAALEGMNGIQK<br>.F          | 3.579 | 0     | R.DLIDLMTLWK.R                     | 3.937 | 0     |
| K.TPTEAPADCR.A                     | 3.563 | 0     | R.NPCEEDMFAWQIDFN<br>GGDR.W        | 3.92  | 0     |
| R.GLQSFVQCQPFER.L                  | 3.503 | 0     | K.AALDSINELPENILLELF<br>THVPAR.Q   | 2.774 | 0     |
| R.GSGTASDDEFENLR.I                 | 3.461 | 0     | K.DWDQPVADWKIFYFLR<br>.S           | 2.629 | 0.001 |
| R.DLSMSEEDQMMR.A                   | 3.404 | 0     | R.EGFITK.D                         | 2.2   | 0.001 |
| R.IKGPNAVQLVK.T                    | 3.266 | 0     | K.HGQEEAAQSPY.R                    | 2.176 | 0.001 |
| R.IVNQPSSLFGSK.S                   | 3.175 | 0     | D.WDQPVADWK.I                      | 1.459 | 0.001 |
| R.QQQAATSESSQSEASVR<br>R.E         | 3.106 | 0     | K.AALDSINELPENILLELF.<br>T         | 1.442 | 0.001 |
| K.YLQSNNSNWR.W                     | 3.013 | 0     | K.YFVTSYEMCLK.S                    | 1.431 | 0.001 |
| R.NPDIFTEVANCCIR.I                 | 2.997 | 0     | H.GTFDPDKVKK.Y                     | 1.42  | 0.001 |
| K.VLLSPDYLPAMR.R                   | 2.886 | 0     | R.EGFITKDWDQPVADWK<br>.I           | 1.411 | 0.004 |
| R.ELQLPSMSMLTSK.T                  | 2.616 | 0     | N.SSIVVSPKMTR.N                    | 1.397 | 0.004 |
| K.ADGTATAPPPR.S                    | 2.614 | 0     | K.RKCLREGF.I                       | 1.396 | 0.004 |
| K.SILTLSHEPK.V                     | 2.531 | 0     | K.IFYFLRSLHRNLL.R                  | 1.389 | 0.004 |
| R.HIIEDPCTLR.H                     | 2.496 | 0     | K.RKCLREGFITKDWD.Q                 | 0.974 | 0.004 |
| R.EMFNPMYALFR.T                    | 2.112 | 0.001 | K.IFYFLRSLHRN.L                    | 0.891 | 0.004 |
| L.VGNDDVHIAR.S                     | 1.85  | 0.001 | K.VESLPGAHGTFDPDK.K                | 0.869 | 0.004 |
| R.NLCYHAQTR.H                      | 1.755 | 0.001 | K.IFYFLRSLHRNLLRNP.<br>A           | 0.864 | 0.004 |
| K.YICQKPSIQK.A                     | 1.66  | 0.001 | R.NLLRNPCAEDMFAWQ<br>I.D           | 0.841 | 0.008 |
| L.SGNRGVQYTR.L                     | 1.65  | 0.001 | K.VKKYFVTSYE.M                     | 0.757 | 0.008 |
| R.EMFNPMYALFR.T                    | 1.621 | 0.001 | K.MTRNQASSEA.Q                     | 0.738 | 0.008 |
| R.LSGNRGVQYTR.L                    | 1.511 | 0.001 | R.LVCSLWRD.L                       | 0.586 | 0.008 |

|                                 |       |       |                    |       |       |
|---------------------------------|-------|-------|--------------------|-------|-------|
| R.DLSMSEEDQMMR.A                | 1.466 | 0.001 | K.RKCLREGFIT.K     | 0.581 | 0.008 |
| R.VLGPAACRNPDI FTEVAN<br>CCIR.I | 1.438 | 0.001 | R.NLLRNPCA EEDM.F  | 0.577 | 0.008 |
| K.VFPSHFTQQR.T                  | 1.322 | 0.004 | R.SLHRNLL.R        | 0.538 | 0.008 |
| R.WCSYSASNNSTIDSAWK.<br>S       | 1.316 | 0.004 | K.KYFVTSYEMCLKSQ.L | 0.516 | 0.01  |
| R.AIAMSLGQDIPMDQR.A             | 1.313 | 0.004 | K.VQLASADYFVLAS.F  | 0.496 | 0.01  |
| K.TQHNGMNNIIR.L                 | 1.235 | 0.004 | R.GVRYILFQHGG.R    | 0.494 | 0.01  |
| K.GLSWQPPPYTPTPR.F              | 1.226 | 0.004 | K.KYFVTSYEMC.L     | 0.489 | 0.01  |

| PICK1                                                    | PEPSc<br>ore | qvalue | KCTD1                                   | PEPSc<br>ore | qvalue |
|----------------------------------------------------------|--------------|--------|-----------------------------------------|--------------|--------|
| K.PMLTDLNTYLNK.A                                         | 7.313        | 0      | M.SRPLITRSPASPLNNQG<br>IPTPAQLTK.S      | 7.112        | 0      |
| R.AFGDVFSVIGVR.E                                         | 6.511        | 0      | K.SNAPVHIDVGGHMYT<br>SSLATLTKYPESR.I    | 6.986        | 0      |
| K.TIKPMLTDLNTYLNK.A                                      | 6.424        | 0      | R.FSRPCECLVVR.V                         | 6.876        | 0      |
| K.QGMSLDIVLKK.V                                          | 6.387        | 0      | R.FPLNGYCHLNSVQVLE<br>R.L               | 5.966        | 0      |
| R.GAAGPLDK.G                                             | 6.291        | 0      | K.SNAPVHIDVGGHMYT<br>SSLATLTK.Y         | 5.551        | 0      |
| R.AFYELSQTHR.A                                           | 6.117        | 0      | K.LLIPDDFK.D                            | 5.436        | 0      |
| K.KYLDVKFEYL.S                                           | 5.645        | 0      | K.SNAPVHIDVGGH.M                        | 5.336        | 0      |
| R.EPQPAASEAFVK.F                                         | 4.993        | 0      | R.LFDGTEPIVLDLTK.Q                      | 4.989        | 0      |
| L.KVKEMDDEEY.S                                           | 4.639        | 0      | K.SLIEEVFPEIGDVMCNS<br>VNAGWNHDSTHVIR.F | 4.765        | 0      |
| K.HVQDIVFQLQR.L                                          | 4.513        | 0      | R.GFEIVGSCGGGVDSSQ<br>FSEYVLR.R.E       | 4.569        | 0      |
| K.YYNDCYAVLR.D                                           | 4.456        | 0      | R.SPASPLNNQGIPTPAQL<br>TK.S             | 4.502        | 0      |
| R.LVENMSSGTADALGLSR<br>.A                                | 3.995        | 0      | R.IGRLFDGTEPIVLDLTK.<br>Q               | 4.231        | 0      |
| R.AILCNDGLVK.R                                           | 3.823        | 0      | K.LLIPDDFKDYTLLEYE<br>AK.Y              | 4.212        | 0      |
| R.DADVPIEVDLAHTTLA<br>YGLNQEEFTDGE EEEEEED<br>TAAGEPSR.D | 3.646        | 0      | K.YPESRIGRLFDGTEPIV<br>LDLTK.Q          | 3.963        | 0      |
| K.VKEMDDEEYSCIALGEP<br>LYR.V                             | 3.631        | 0      | P.ASPLNNQGIPTPAQLTK<br>.S               | 3.861        | 0      |
| R.VSTGNYEYR.L                                            | 3.584        | 0      | Y.TSSLATLTK.Y                           | 3.711        | 0      |
| K.FEYLSYCLK.V                                            | 3.556        | 0      | K.QHYFIDRDGQMFR.Y                       | 3.658        | 0      |
| R.DADVPIEVDLAHTTLA<br>Y.G                                | 3.499        | 0      | K.YFQLQPMLLEMER.W                       | 3.541        | 0      |

|                                                             |       |       |                                  |       |       |
|-------------------------------------------------------------|-------|-------|----------------------------------|-------|-------|
| K.EMDDEEYSCIALGEPLY<br>R.V                                  | 3.456 | 0     | K.YFQLQPMLLEMERWK.<br>Q          | 2.963 | 0     |
| V.STGNYEYR.L                                                | 3.446 | 0     | H.MYTSSLATLTK.Y                  | 2.876 | 0     |
| D.GEEEEEEEDTAAGEPSR.<br>D                                   | 3.321 | 0     | R.GFEIVGSCGGGVDSSQ<br>FSEYVLR.R  | 2.569 | 0     |
| K.QGMSLDIVLK.K                                              | 3.295 | 0     | Q.RGFEIVGSCGGGVDSS<br>QFSEYVLR.R | 2.459 | 0     |
| C.LYIVQVFDNTPAALDGT<br>VAAGDEITGVNGR.S                      | 3.187 | 0     | R.PLITRSPASPLNN.Q                | 1.019 | 0.001 |
| R.LVSTMSKYNDYAVL<br>R.D                                     | 3.108 | 0     | R.SPASPLNNQGIPTPAQL<br>T.K       | 1.016 | 0.001 |
| R.AFGDVFSVIGVREPQPA<br>ASEAFVK.F                            | 20887 | 0     | K.YPESRIGRL.F                    | 0.994 | 0.001 |
| K.HRLVENMSSGTADALG<br>LSR.A                                 | 2.789 | 0     | R.IGRLFDGTEPIV.L                 | 0.988 | 0.001 |
| L.YIVQVFDNTPAALDGT<br>AAGDEITGVNGRSIKGKTK<br>VEVAKMIQEVKG.E | 2.715 | 0     | K.QHYFIDRDG.Q                    | 0.985 | 0.001 |
| K.MELLDQK.H                                                 | 2.633 | 0     | R.DGQMFYILNFLRTS.K               | 0.872 | 0.002 |
| K.HVQDIVFQLQRLVSTMS<br>K.Y                                  | 2.546 | 0     | R.YILNFLRTSKL.L                  | 0.87  | 0.002 |
| D.GTVAAGDEITGVNGR.S                                         | 2.419 | 0     | R.TSKLLIPDDF.K                   | 0.863 | 0.002 |
| E.YSCIALGEPLYRVSTGNY<br>E.Y                                 | 2.356 | 0.001 | K.DYTLLEYEA.K                    | 0.848 | 0.002 |
| R.GAAGPLDKGGSWCDS.]                                         | 1.618 | 0.001 | R.WKQDRETGRFS.R                  | 0.769 | 0.006 |
| R.DADVPIEVDLAH.T                                            | 1.608 | 0.001 | K.QDRETGRFS.R                    | 0.733 | 0.006 |
| P.AASEAFVK.F                                                | 1.594 | 0.001 | R.ETGRFSRPEC.L                   | 0.689 | 0.006 |
| K.FADAHR.S                                                  | 1.571 | 0.001 | R.PCECLVVRVAPDLGE.<br>R          | 0.665 | 0.006 |
| R.LILRCR.Q                                                  | 1.507 | 0.002 | R.VAPDLGERITLSGD.K               | 0.587 | 0.006 |
| K.LGIPTVPGKVTLQK.D                                          | 1.131 | 0.002 | R.ITLSGDKSLIEEV.F                | 0.546 | 0.006 |
| K.HRLVENMSSGTADALG<br>LSRAILCNDGLVK.R                       | 1.082 | 0.002 | R.LQQRGFEIVGSC.G                 | 0.455 | 0.006 |
| K.FADAHRSIEK.F                                              | 1.051 | 0.002 | R.RELRRTPRVP.S                   | 0.454 | 0.006 |
| R.LTIKKYLDVKFEY.L                                           | 0.468 | 0.008 |                                  |       |       |
| K.KYLDVKFEYLSYCL.K                                          | 0.464 | 0.008 |                                  |       |       |

| PRMT7                       | PEPSc<br>ore | qvalue | ELAVL1                   | PEPSc<br>ore | qvalue |
|-----------------------------|--------------|--------|--------------------------|--------------|--------|
| R.SPCGDCEGFDVHIMDDMI<br>K.R | 6.62         | 0      | T.NYEEAAMAIASLNGYR.<br>L | 6.957        | 0      |
| K.RPELLTNEDLQGR.K           | 6.515        | 0      | R.TMTQKDVEDMFSR.F        | 6.899        | 0      |
| K.RPELLTNEDLQGRK.V          | 6.359        | 0      | D.IGRTNLIVNYLPQNMTQ      | 6.781        | 0      |

|                                    |       |   |                                    |       |       |
|------------------------------------|-------|---|------------------------------------|-------|-------|
|                                    |       |   | DE.L                               |       |       |
| N.ILVTELFDTTELIGEGALPS<br>YEHAHR.H | 6.352 | 0 | M.SNGYEDHMAEDCRGDI<br>GR.T         | 6.653 | 0     |
| R.AQVVLSWWDIEMDPEGK.<br>I          | 6.32  | 0 | K.RSEAEAAITSFNGHKPP<br>GSSEPITVK.F | 6.542 | 0     |
| R.SSYADMLHDKDR.N                   | 6.291 | 0 | K.FAANPNQKNVALLSQ<br>LYHSPAR.R     | 6.503 | 0     |
| R.ANPTTGSVEWLEEDEHYD<br>YHQEIAR.S  | 6.256 | 0 | K.CKGFVMTNYEEAA<br>MAIASLNGYR.L    | 6.231 | 0     |
| K.QVSSAACHSR.R                     | 5.638 | 0 | R.TNLIVNYLPQNMTQDEL<br>R.S         | 5.264 | 0     |
| R.HLVEENCEAVPHR.A                  | 5.605 | 0 | F.VTMTNYEEAAMAIASL<br>NGYR.L       | 5.258 | 0     |
| R.EAEPHPLWEYPCR.S                  | 5.501 | 0 | S.LGYGFVNYVTAK.D                   | 5.224 | 0     |
| F.WAHSPEEMQWR.D                    | 5.386 | 0 | K.VSYARPSSEVIKDANLY<br>ISGLPR.T    | 5.073 | 0     |
| R.FGEINDQDR.TDR.Y                  | 5.36  | 0 | H.SLGYGFVNYVTAKDAE<br>R.A          | 4.912 | 0     |
| K.VINKHSTEVTVGPEGDMPC<br>R.A       | 4.454 | 0 | M.SNGYEDHMAEDCR.G                  | 4.756 | 0     |
| K.CTMAPFWAHSPEEMQW<br>R.D          | 4.375 | 0 | K.NVALLSQLYHSPAR.R                 | 4.654 | 0     |
| R.QMRPVCDCQAHLLWNR<br>R.F          | 4.341 | 0 | L.IVNYLPQNMTQDEL.R.S               | 4.61  | 0     |
| R.TVSYAVEFHPDTGDIIMEF<br>R.H       | 4.274 | 0 | R.PSSEVIKDANLYISGLPR.<br>T         | 4.543 | 0     |
| K.HSTEVTVGPEGDMPCR.A               | 4.271 | 0 | K.DAERAINLNLRLQSK<br>.T            | 4.537 | 0     |
| R.SSYADMLHDK.D                     | 4.269 | 0 | R.GDIGRTNLIVNYLPQNM<br>TQDEL.R.S   | 3.839 | 0     |
| R.FGEINDQDR.T                      | 4.267 | 0 | K.NVALLSQLYHSPA.R                  | 3.785 | 0     |
| R.TAVDQHLGPGAM.V                   | 4.246 | 0 | R.SLFSSIGEVESAKLIR.D               | 3.718 | 0     |
| R.SPCGDCEGFDVH.I                   | 3.632 | 0 | F.SSIGEVESAKL.I                    | 3.703 | 0     |
| K.ANHLEDKINIEK.R                   | 3.575 | 0 | R.VLVDQTTGLSR.G                    | 3.643 | 0     |
| R.TDRYVQALR.T                      | 3.524 | 0 | V.NYLPQNMTQDEL.R.S                 | 2.771 | 0     |
| Y.DYHQEIARSSYA.D                   | 3.496 | 0 | R.DKVAGHSLGYGFVNY.<br>V            | 2.765 | 0     |
| F.TVESSAASHK.L                     | 3.456 | 0 | N.LIVNYLPQNMTQDEL.R.<br>S          | 2.75  | 0     |
| R.FGEINDQDR.TDRYVQALR<br>.T        | 3.346 | 0 | I.VNYLPQNMTQDEL.R.S                | 2.713 | 0     |
| K.ANHLEDK.I                        | 3.314 | 0 | M.FGPFGAVTNVK.V                    | 1.856 | 0.001 |
| R.RFEPLTSGR.A                      | 2.865 | 0 | K.RSEAEAAITSFNGH.K                 | 1.854 | 0.001 |

|                                   |       |   |                                   |       |       |
|-----------------------------------|-------|---|-----------------------------------|-------|-------|
| Y.AVEFHPDTGDIIMEFR.H              | 2.858 | 0 | N.YLPQNMTQDELR.S                  | 1.843 | 0.001 |
| R.ATVYAQLVESGR.M                  | 2.841 | 0 | S.LFSSIGEVESAK.L                  | 1.821 | 0.001 |
| R.IRSPCGDCEGFDVHIMDD<br>MIK.R     | 2.797 | 0 | R.FSPMGVDHMSGLSGVN<br>VPGNASSGW.C | 1.809 | 0.001 |
| R.SPCGDCEGFDVHIMDDMI<br>KR.A      | 2.788 | 0 | V.ALLSQLYHSPAR.R                  | 1.801 | 0.001 |
| R.SSYADMLHDKDRNVK.Y               | 2.788 | 0 | R.SEAEAAITSFNGHKPPGS<br>SEPITVK.F | 1.785 | 0.001 |
| R.HLVEENCEAVPHRATVY<br>AQLVESGR.M | 1.875 | 0 |                                   |       |       |
| H.HLGVEQVFTVESSAASHK<br>.L        | 1.858 | 0 |                                   |       |       |

| CDKN1B                                     | PEPSc<br>ore | qvalue | ROCK1                               | PEPSc<br>ore | qvalue |
|--------------------------------------------|--------------|--------|-------------------------------------|--------------|--------|
| K.TDPSDSQTGLAEQCAGIR<br>K.R                | 6.589        | 0      | R.TSSNADKSLQESLQK.T                 | 7.123        | 0      |
| K.VPAQESQDVSGSR.P                          | 6.431        | 0      | R.GLLEEQYFELTQESK.K                 | 6.986        | 0      |
| R.NLFGPVDHEELTR.D                          | 6.112        | 0      | R.YLSSANPNDNRTSSNA<br>DK.S          | 6.762        | 0      |
| R.ANRTEENVSDGSPNAGSV<br>EQTPK.K            | 6.039        | 0      | R.GHDSEMIGDLQAR.I                   | 6.486        | 0      |
| K.WNFDFQNHKPLEGK.Y                         | 5.987        | 0      | K.VSQNSQLANEKLSQLQ<br>K.Q           | 6.354        | 0      |
| R.TEENVSDGSPNAGSVEQT<br>PK.K               | 5.876        | 0      | R.YLSSANPNDNR.T                     | 6.216        | 0      |
| P.AQESQDVSGSRPAAPLIGA<br>PANSEDTHLVDPK.T   | 5.561        | 0      | K.AFVGNQLPVGFTYYYS<br>NR.R          | 5.963        | 0      |
| K.RANRTEENVSDGSPNAGS<br>VEQTPK.K           | 5.134        | 0      | K.LLDLSDSTSVASFPSAD<br>ETDGNLPESR.I | 5.569        | 0      |
| K.RPATDDSSTQNK.R                           | 4.985        | 0      | R.DMLLLACSQDEQKK.<br>W              | 5.123        | 0      |
| K.HCRDMEEASQRK.W                           | 4.17         | 0      | M.STGDSFETRFEK.M                    | 4.962        | 0      |
| R.KRPATDDSSTQNK.R.A                        | 4.15         | 0      | R.DRGHDSEMIGDLQAR.I                 | 4.853        | 0      |
| K.VPAQESQDVSGSRPAAPLI<br>GAPANSEDTHLVDPK.T | 4.115        | 0      | R.NLESTVSQIEKEK.M                   | 4.561        | 0      |
| K.WNFDFQNHKPLEGKYEW<br>QEVEK.G             | 4.088        | 0      | K.AAFEKNINTER.T                     | 3.983        | 0      |
| R.TEENVSDGSPNAGSVEQT<br>PKKPLR.R           | 4.067        | 0      | R.IEGWLSVPNR.G                      | 3.654        | 0      |
| R.DMEEASQR.K                               | 3.308        | 0      | R.MKAEDYEVVK.V                      | 3.261        | 0      |
| K.WNFDFQNHK.P                              | 3.306        | 0      | K.ESDIEQLRAK.L                      | 2.869        | 0      |
| R.QAHPKPSACR.N                             | 3.263        | 0      | K.DVEMEPVQAEK.T                     | 2.804        | 0      |

|                                                    |       |       |                            |       |       |
|----------------------------------------------------|-------|-------|----------------------------|-------|-------|
| F.GPVDHEELTR.D                                     | 3.216 | 0     | R.LTDKHQSIEEAK.S           | 2.747 | 0     |
| K.YEWQEVEK.G                                       | 3.185 | 0     | R.LEQEVNEHKVTK.A           | 2.713 | 0     |
| R.PAAPLIGAPANSEDTHLVD<br>PK.T                      | 3.173 | 0     | K.IMKELDEEGNQRR.N          | 2.316 | 0     |
| R.KWNFDFQNHKPLEGKYE<br>WQEVEK.G                    | 3.169 | 0     | L.TDKHQSIEEAK.S            | 1.681 | 0.001 |
| A.NRTEENVSDGSPNAGSVE<br>QTPK.K                     | 3.146 | 0     | K.MNKEGMVR.C               | 1.678 | 0.001 |
| K.GACKVPAQESQDVSGSRP<br>AAPLIGAPANSEDTHLVDPK<br>.T | 2.27  | 0     | R.NGVVEEIKR.H              | 1.67  | 0.001 |
| R.ANRTEENVSDGSPNAGSV<br>EQTPKKPGLR.R               | 2.243 | 0     | K.NLTLQLEQESNKR.L          | 1.662 | 0.001 |
| R.VSNGSPSLERMDA.R                                  | 2.225 | 0.002 | K.QLEEANDLLRTESDTA<br>VR.L | 1.645 | 0.001 |
| R.MDARQAEHPKPSAC.R                                 | 2.211 | 0.002 |                            |       |       |
| K.PSACRNLFPG.V                                     | 1.756 | 0.002 |                            |       |       |
| R.DLEKHCRDMEEASQR.K                                | 1.724 | 0.002 |                            |       |       |

**Appendix Table S6.** Identification of UHMK1-interacting proteins via MS

| Swiss-Prot accession no. | Gene Symbol | Protein name                               | No. of unique peptides (95%) |
|--------------------------|-------------|--------------------------------------------|------------------------------|
| Q9Y6Q9                   | NCOA3       | Nuclear receptor coactivator 3             | 66                           |
| P00519                   | ABL1        | Tyrosine-protein kinase ABL1               | 58                           |
| Q07955                   | SRSF1       | Serine/arginine-rich splicing factor 1     | 55                           |
| P62328                   | TMSB4X      | Thymosin beta-4                            | 49                           |
| Q7Z6Z7                   | HUWE1       | E3 ubiquitin-protein ligase HUWE1          | 45                           |
| Q9NRD1                   | FBXO6       | F-box only protein 6                       | 45                           |
| Q9NRD5                   | PICK1       | PRKCA-binding protein                      | 41                           |
| Q719H9                   | KCTD1       | BTB/POZ domain-containing protein<br>KCTD1 | 39                           |
| Q9NVM4                   | PRMT7       | Protein arginine N-methyltransferase 7     | 35                           |
| Q15717                   | ELAVL1      | ELAV-like protein 1                        | 33                           |
| P46527                   | CDKN1B      | Cyclin-dependent kinase inhibitor 1B       | 28                           |
| Q13464                   | ROCK1       | Rho-associated protein kinase 1            | 25                           |



**Appendix Table S7.** Relationship between UHMK1 or p-NCOA3 expression and clinicopathological features of GC patients (n=120)

| Variable                            | UHMK1 expression |      |                  | p-NCOA3 expression |      |                  |
|-------------------------------------|------------------|------|------------------|--------------------|------|------------------|
|                                     | Low              | High | P value          | Low                | High | P value          |
| <b>All cases</b>                    | 58               | 62   |                  | 63                 | 57   |                  |
| <b>Gender</b>                       |                  |      | NS               |                    |      | NS               |
| Male                                | 35               | 40   |                  | 38                 | 37   |                  |
| Female                              | 23               | 22   |                  | 25                 | 20   |                  |
| <b>Age</b>                          |                  |      | NS               |                    |      | NS               |
| ≤50                                 | 28               | 24   |                  | 26                 | 26   |                  |
| >50                                 | 30               | 38   |                  | 37                 | 31   |                  |
| <b>Histological differentiation</b> |                  |      | NS               |                    |      | NS               |
| Well/Moderately                     | 31               | 34   |                  | 33                 | 32   |                  |
| Poorly                              | 27               | 28   |                  | 30                 | 25   |                  |
| <b>Tumor size</b>                   |                  |      | <b>P&lt;0.05</b> |                    |      | <b>P&lt;0.05</b> |
| ≤5cm                                | 35               | 25   |                  | 38                 | 22   |                  |
| >5cm                                | 23               | 37   |                  | 25                 | 35   |                  |
| <b>Distant metastasis</b>           |                  |      | <b>P&lt;0.05</b> |                    |      | <b>P&lt;0.05</b> |
| Yes                                 | 8                | 19   |                  | 6                  | 21   |                  |
| No                                  | 50               | 43   |                  | 57                 | 36   |                  |
| <b>Tumor stage</b>                  |                  |      | <b>P&lt;0.05</b> |                    |      | <b>P&lt;0.01</b> |
| I-II                                | 34               | 23   |                  | 37                 | 20   |                  |
| III-IV                              | 24               | 39   |                  | 26                 | 37   |                  |
| <b>Lymphatic invasion</b>           |                  |      | <b>P&lt;0.05</b> |                    |      | <b>P&lt;0.05</b> |
| Yes                                 | 20               | 33   |                  | 22                 | 31   |                  |
| No                                  | 38               | 29   |                  | 41                 | 26   |                  |
| <b>Vascular invasion</b>            |                  |      | NS               |                    |      | NS               |
| Yes                                 | 29               | 28   |                  | 28                 | 29   |                  |
| No                                  | 29               | 34   |                  | 35                 | 28   |                  |
| <b><i>H.pylori</i> infection</b>    |                  |      | <b>P&lt;0.05</b> |                    |      | <b>P&lt;0.01</b> |
| Yes                                 | 25               | 40   |                  | 26                 | 39   |                  |
| No                                  | 33               | 22   |                  | 37                 | 18   |                  |

Note: GC patients were divided into UHMK1 high/low or p-NCOA3 high/low groups according to the analysis of qRT-PCR detection or H-score. NS, not significant between different groups. Differences among variables were evaluated by  $\chi^2$  or Fisher's exact  $\chi^2$ -test.

**Appendix Table S8.** Univariate and multivariate analysis of factors associated with survival in GC patients (n=120)

| Variable                            | Univariate analysis |                  | multivariate analysis |              |
|-------------------------------------|---------------------|------------------|-----------------------|--------------|
|                                     | HR (95% CI)         | P-value          | HR (95% CI)           | P-value      |
| <b>Gender</b>                       |                     |                  |                       |              |
| Male vs. Female                     | 1.108(0.700-1.754)  | 0.662            |                       |              |
| <b>Age</b>                          |                     |                  |                       |              |
| ≤50 vs. >50                         | 0.999(0.626-1.596)  | 0.998            |                       |              |
| <b>Histological differentiation</b> |                     |                  |                       |              |
| Well/Moderately vs. Poorly          | 0.906(0.574-1.430)  | 0.673            |                       |              |
| <b>Tumor size</b>                   |                     |                  |                       |              |
| ≤5cm vs. >5cm                       | 2.202(1.271-3.216)  | <b>0.003</b>     | 2.002(1.229-3.262)    | <b>0.005</b> |
| <b>Distant metastasis</b>           |                     |                  |                       |              |
| Yes vs. No                          | 2.301(1.404-3.770)  | <b>0.001</b>     |                       |              |
| <b>Tumor stage</b>                  |                     |                  |                       |              |
| I-II vs. III-IV                     | 1.765 (1.110-2.805) | <b>0.016</b>     |                       |              |
| <b>Lymphatic invasion</b>           |                     |                  |                       |              |
| Yes vs. No                          | 1.685(1.069-2.655)  | <b>0.025</b>     |                       |              |
| <b>Vascular invasion</b>            |                     |                  |                       |              |
| Yes vs. No                          | 1.344(0.854-2.114)  | 0.201            |                       |              |
| <b>H.pylori infection</b>           |                     |                  |                       |              |
| Positive vs. Negative               | 2.104(1.311-3.379)  | <b>0.002</b>     | 1.691(1.016-2.814)    | <b>0.043</b> |
| <b>UHMK1 expression</b>             |                     |                  |                       |              |
| High vs. Low                        | 2.899(1.777-4.728)  | <b>&lt;0.001</b> | 1.938(1.141-3.292)    | <b>0.014</b> |

## Appendix Figure S1

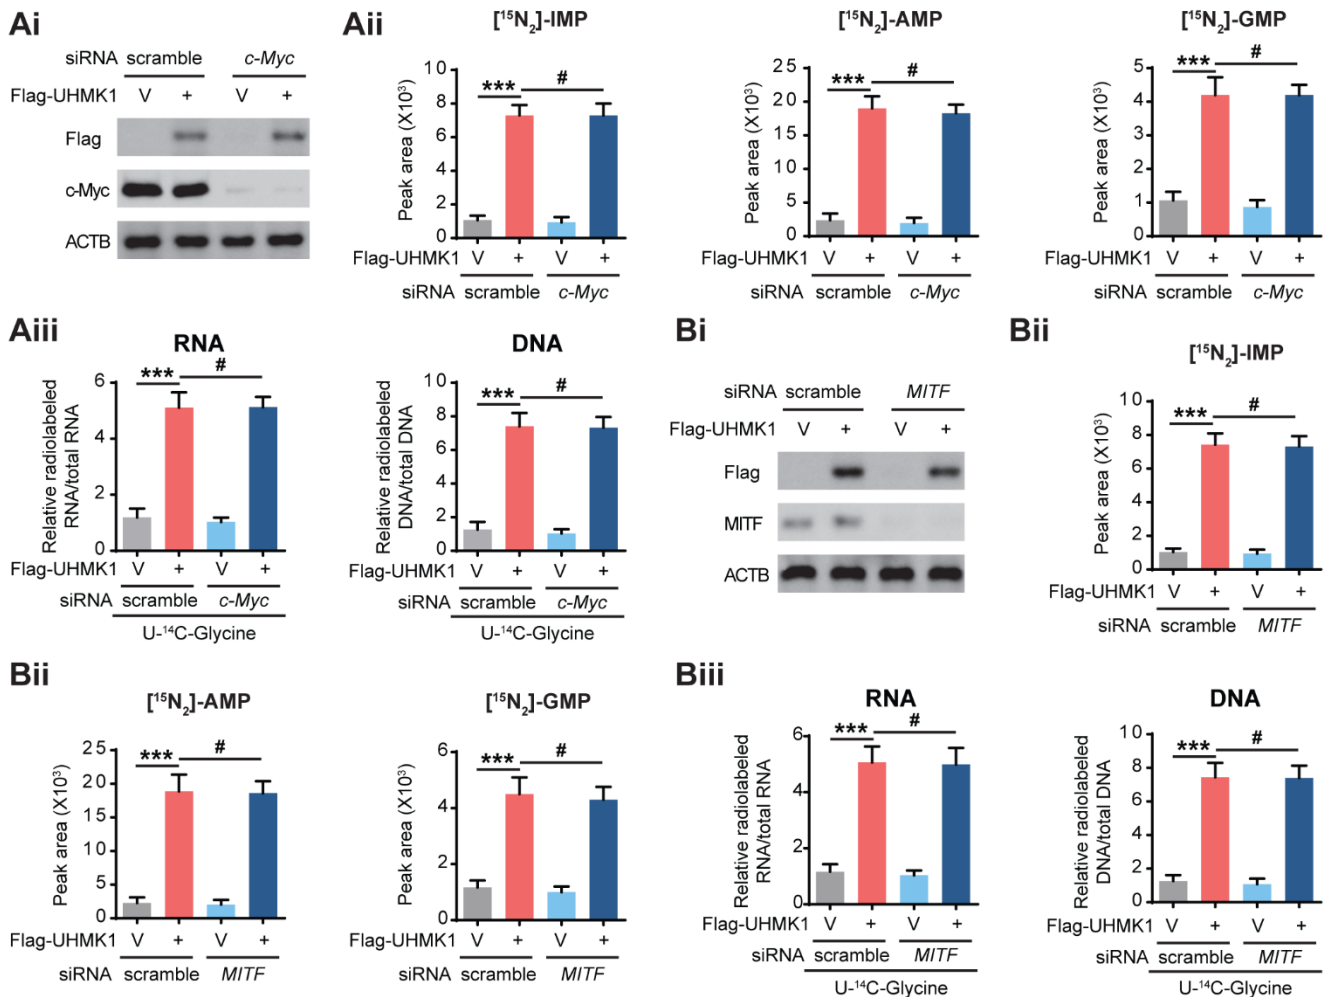

**Appendix Figure S1. c-Myc or MITF could not reverse UHMK1-driven increase in the purine metabolism intermediates.** (Ai) Western blots confirmed UHMK1 overexpression and *c-Myc* knockdown in BGC823 cells. (Aii) Silencing *c-Myc* could not decrease the levels of metabolites as indicated in BGC823 cells overexpressing UHMK1. (Aiii) Silencing *c-Myc* could not decrease the levels of RNA and DNA with U-<sup>14</sup>C-glycine in BGC823 cells overexpressing UHMK1. (Bi) Western blots confirmed UHMK1 overexpression and *MITF* knockdown in BGC823 cells. (Bii) Silencing *MITF* could not decrease the levels of metabolites as indicated in BGC823 cells overexpressing UHMK1. (Biii) Silencing *MITF* could not decrease the levels of RNA and DNA with U-<sup>14</sup>C-glycine in BGC823 cells overexpressing UHMK1.

## Appendix Figure S2

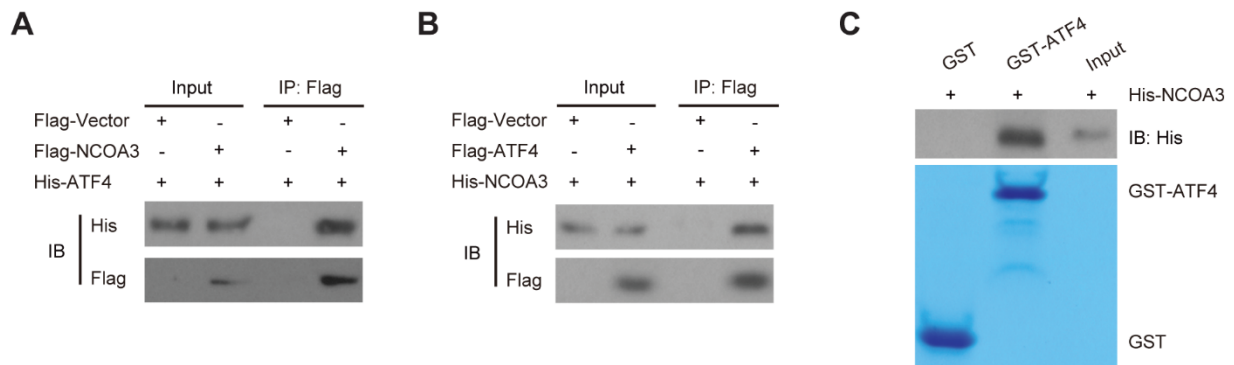

### Appendix Figure S2. Interaction between NCOA3 and ATF4.

(A and B) Co-IP assays were performed in BGC823 cells with indicated plasmids and antibodies. (C) GST-pull down assay with indicated proteins and antibodies.

## Appendix Figure S3

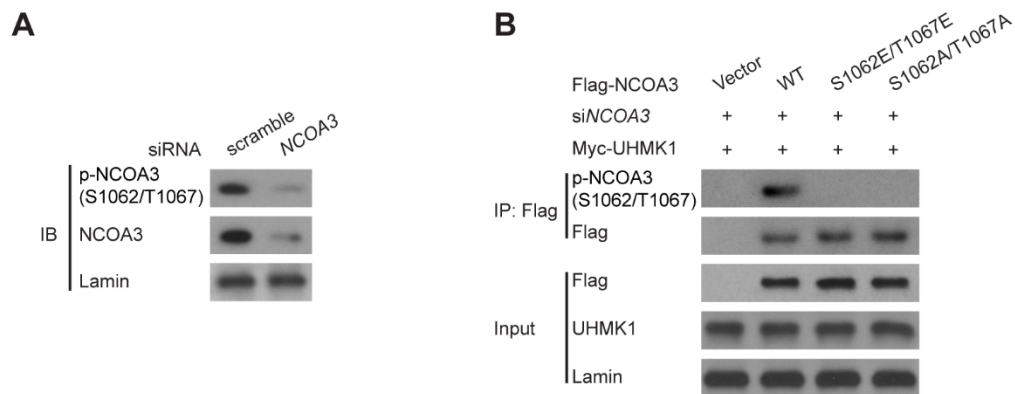

### Appendix Figure S3. The validation of the phospho-S1062/T1067 NCOA3 antibody.

(A) *NCOA3* was knockdown by siRNA in SGC7091 cells. Then western blots were performed with a new phospho-S1062/T1067 NCOA3 antibody.

(B) BGC823 cells with endogenous *NCOA3* knockdown were transfected with indicated plasmids and probed with indicated antibodies.

### **Appendix Figure S4**

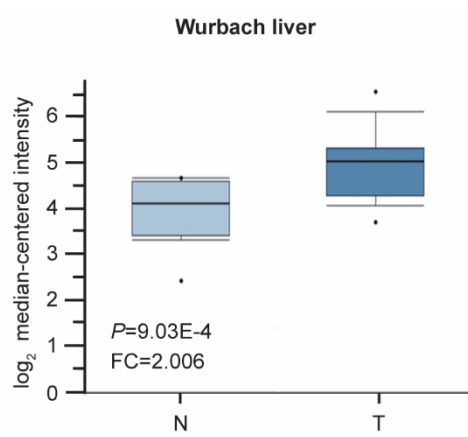

**Appendix Figure S4. Analysis of UHMK1 expression from liver patients in**

**Oncomine database.**
